# Supplementary material
Source: HighWire-hosted journal article supplement (https://drc.bmj.com/content/8/1/e001600)

**Figure S1** Associations between glycated haemoglobin (HbA1c) and incidence of secondary cancer outcomes

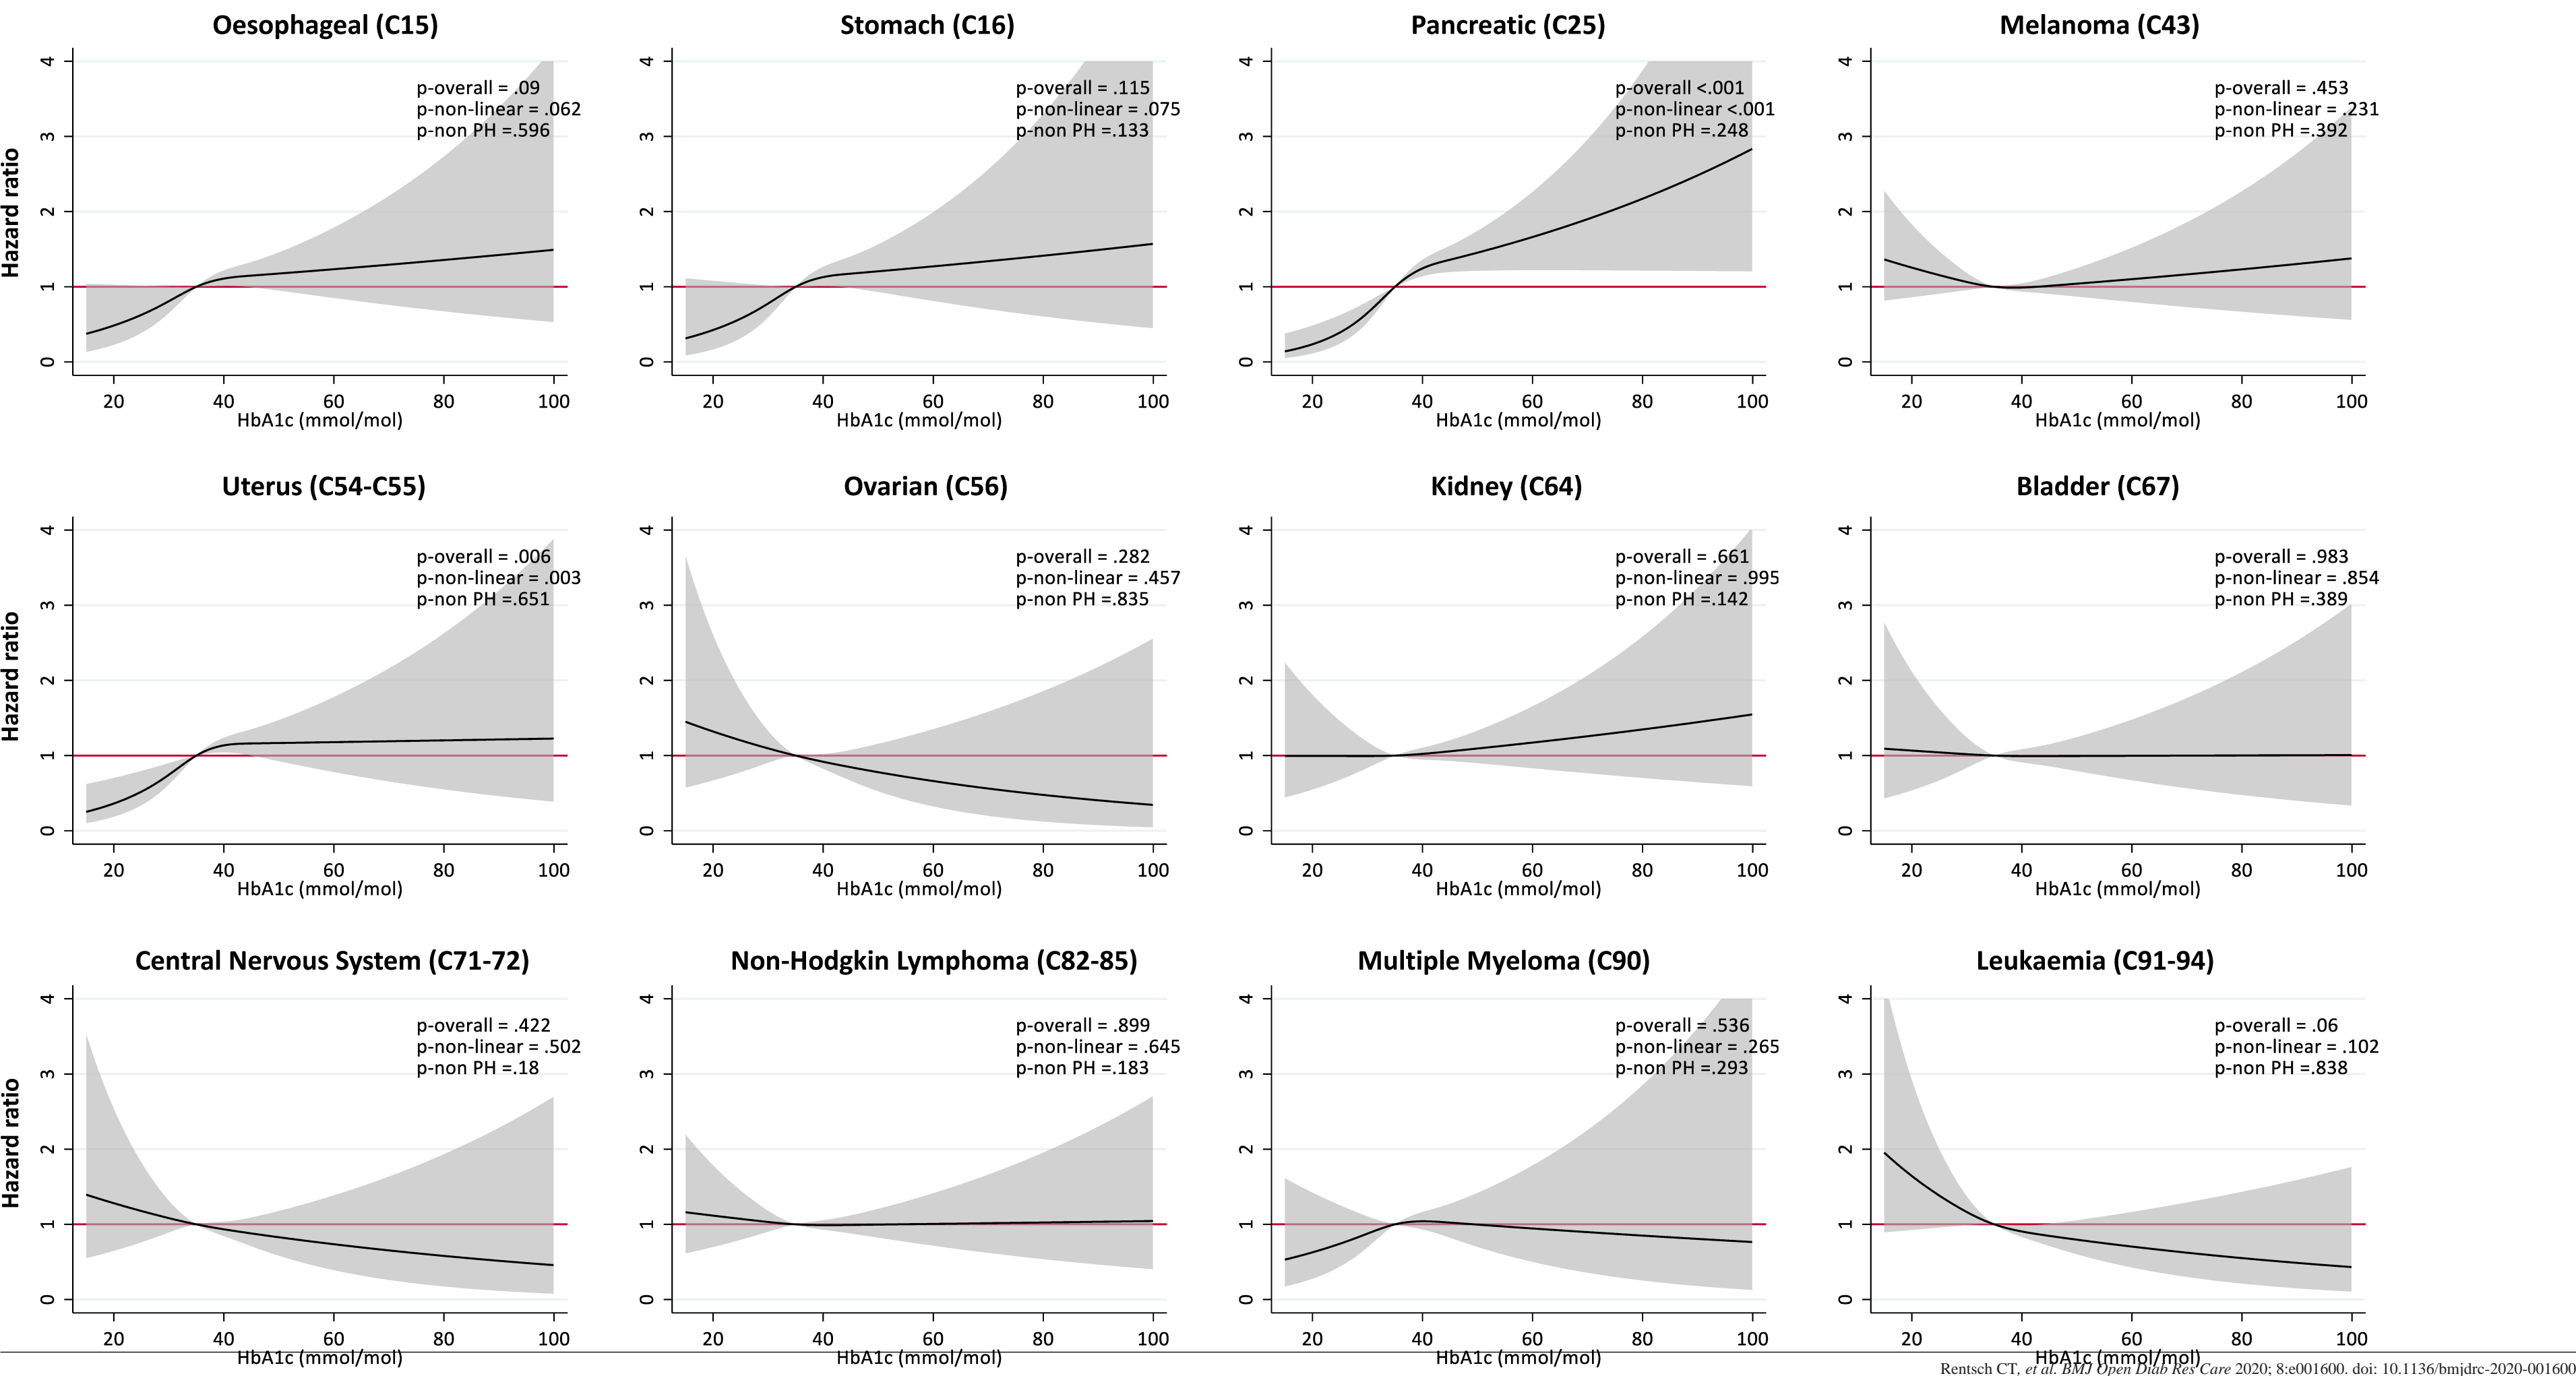

**Figure S2** Associations between glycated haemoglobin (HbA1c) and incidence of secondary cancer outcomes, excluding participants who reported diabetes diagnosis or metformin exposure at baseline

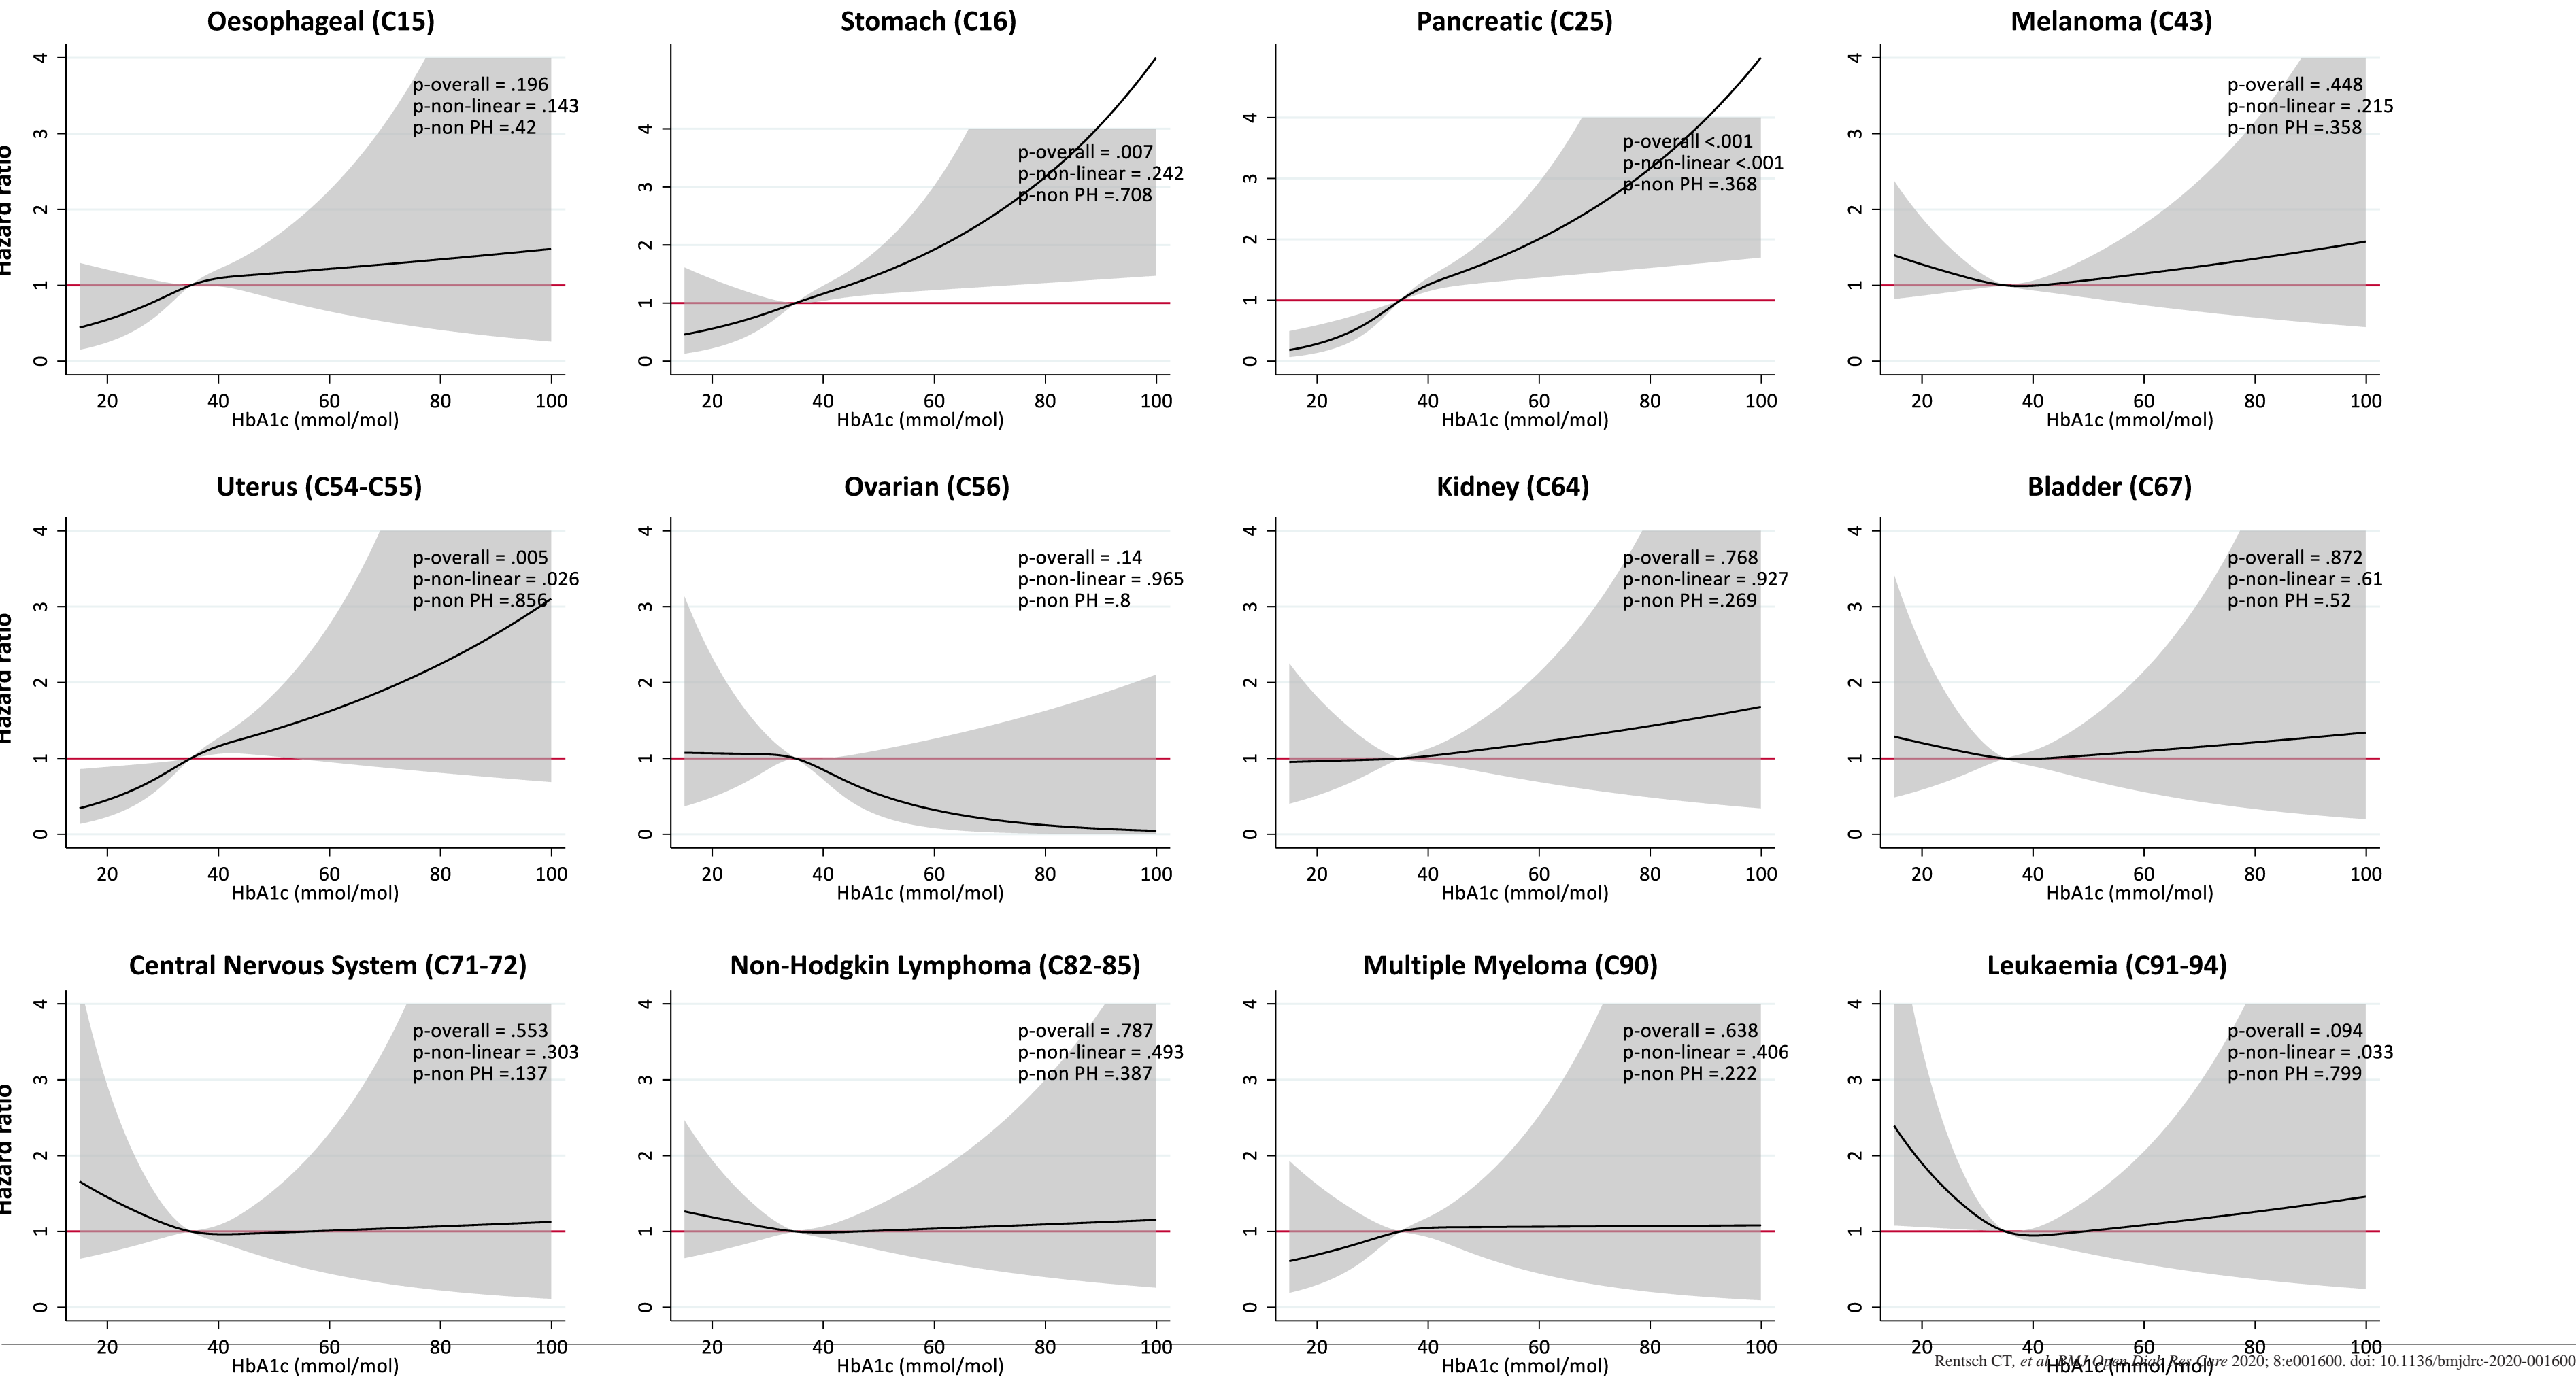

**Figure S3** Associations between glycated haemoglobin (HbA1c) and incidence of 16 cancers, excluding participants with smoking history

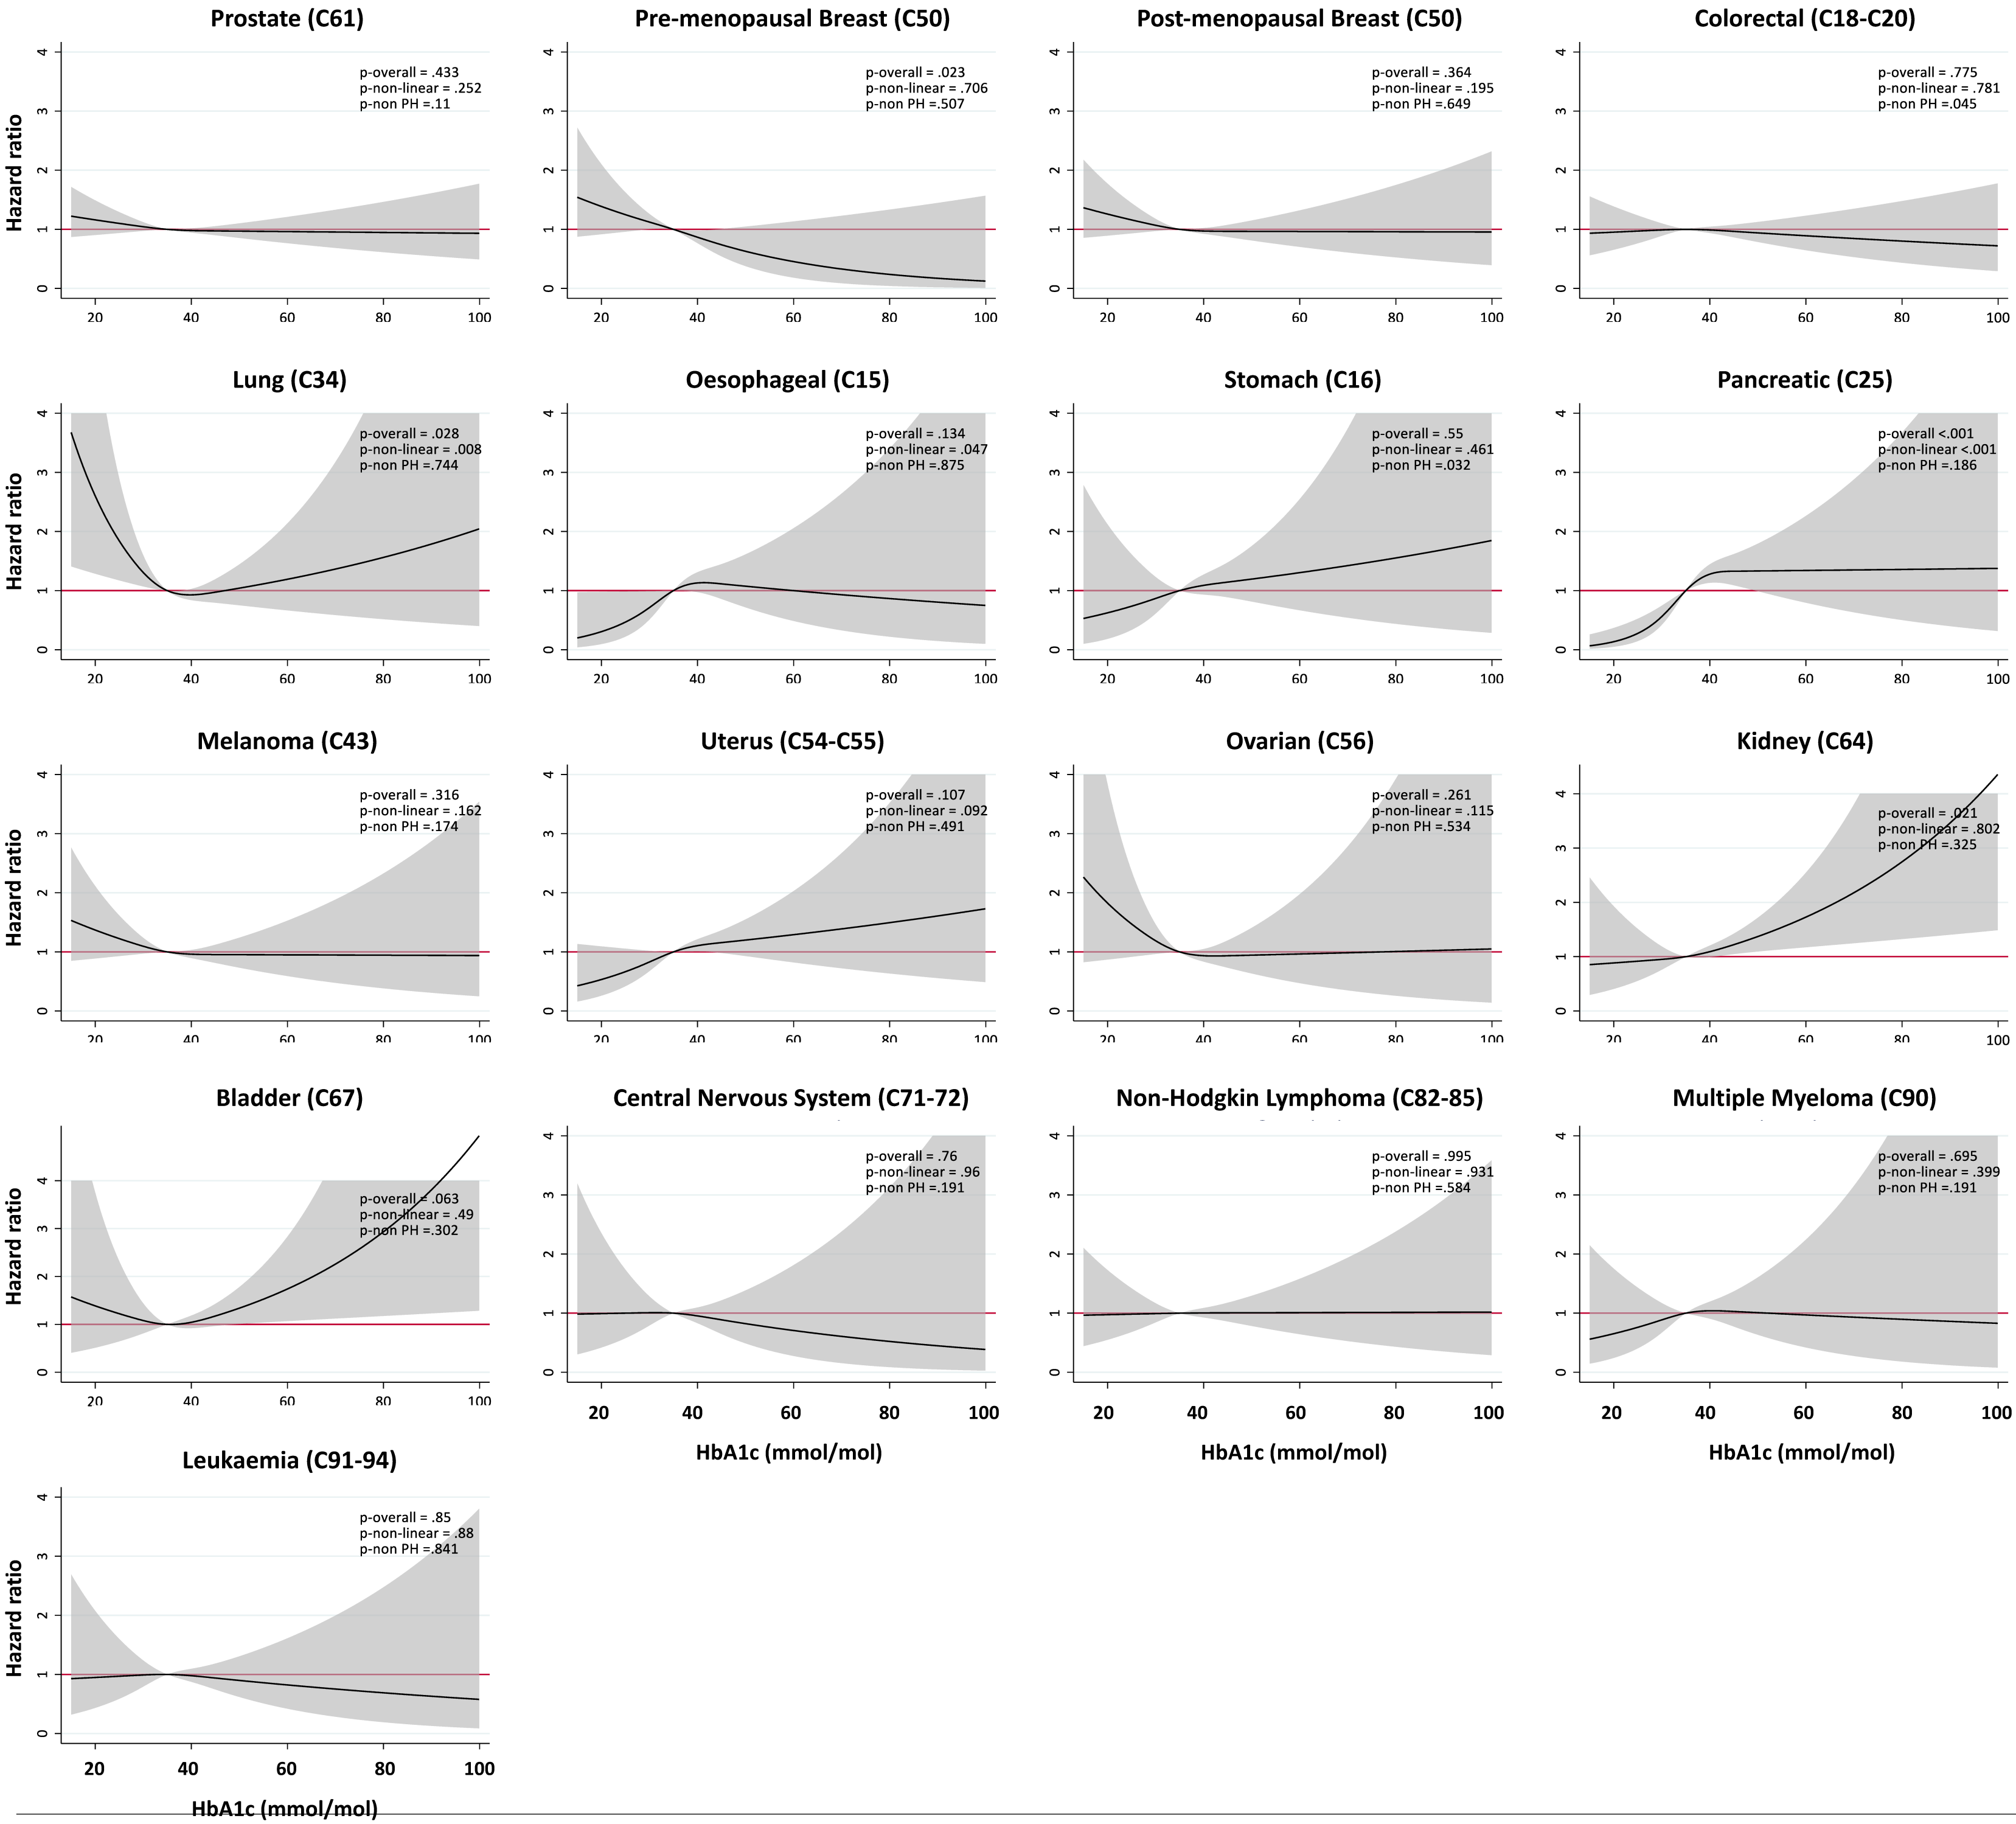

**Figure S4** Associations between glycated haemoglobin (HbA1c) and incidence of primary cancer outcomes, by time since baseline

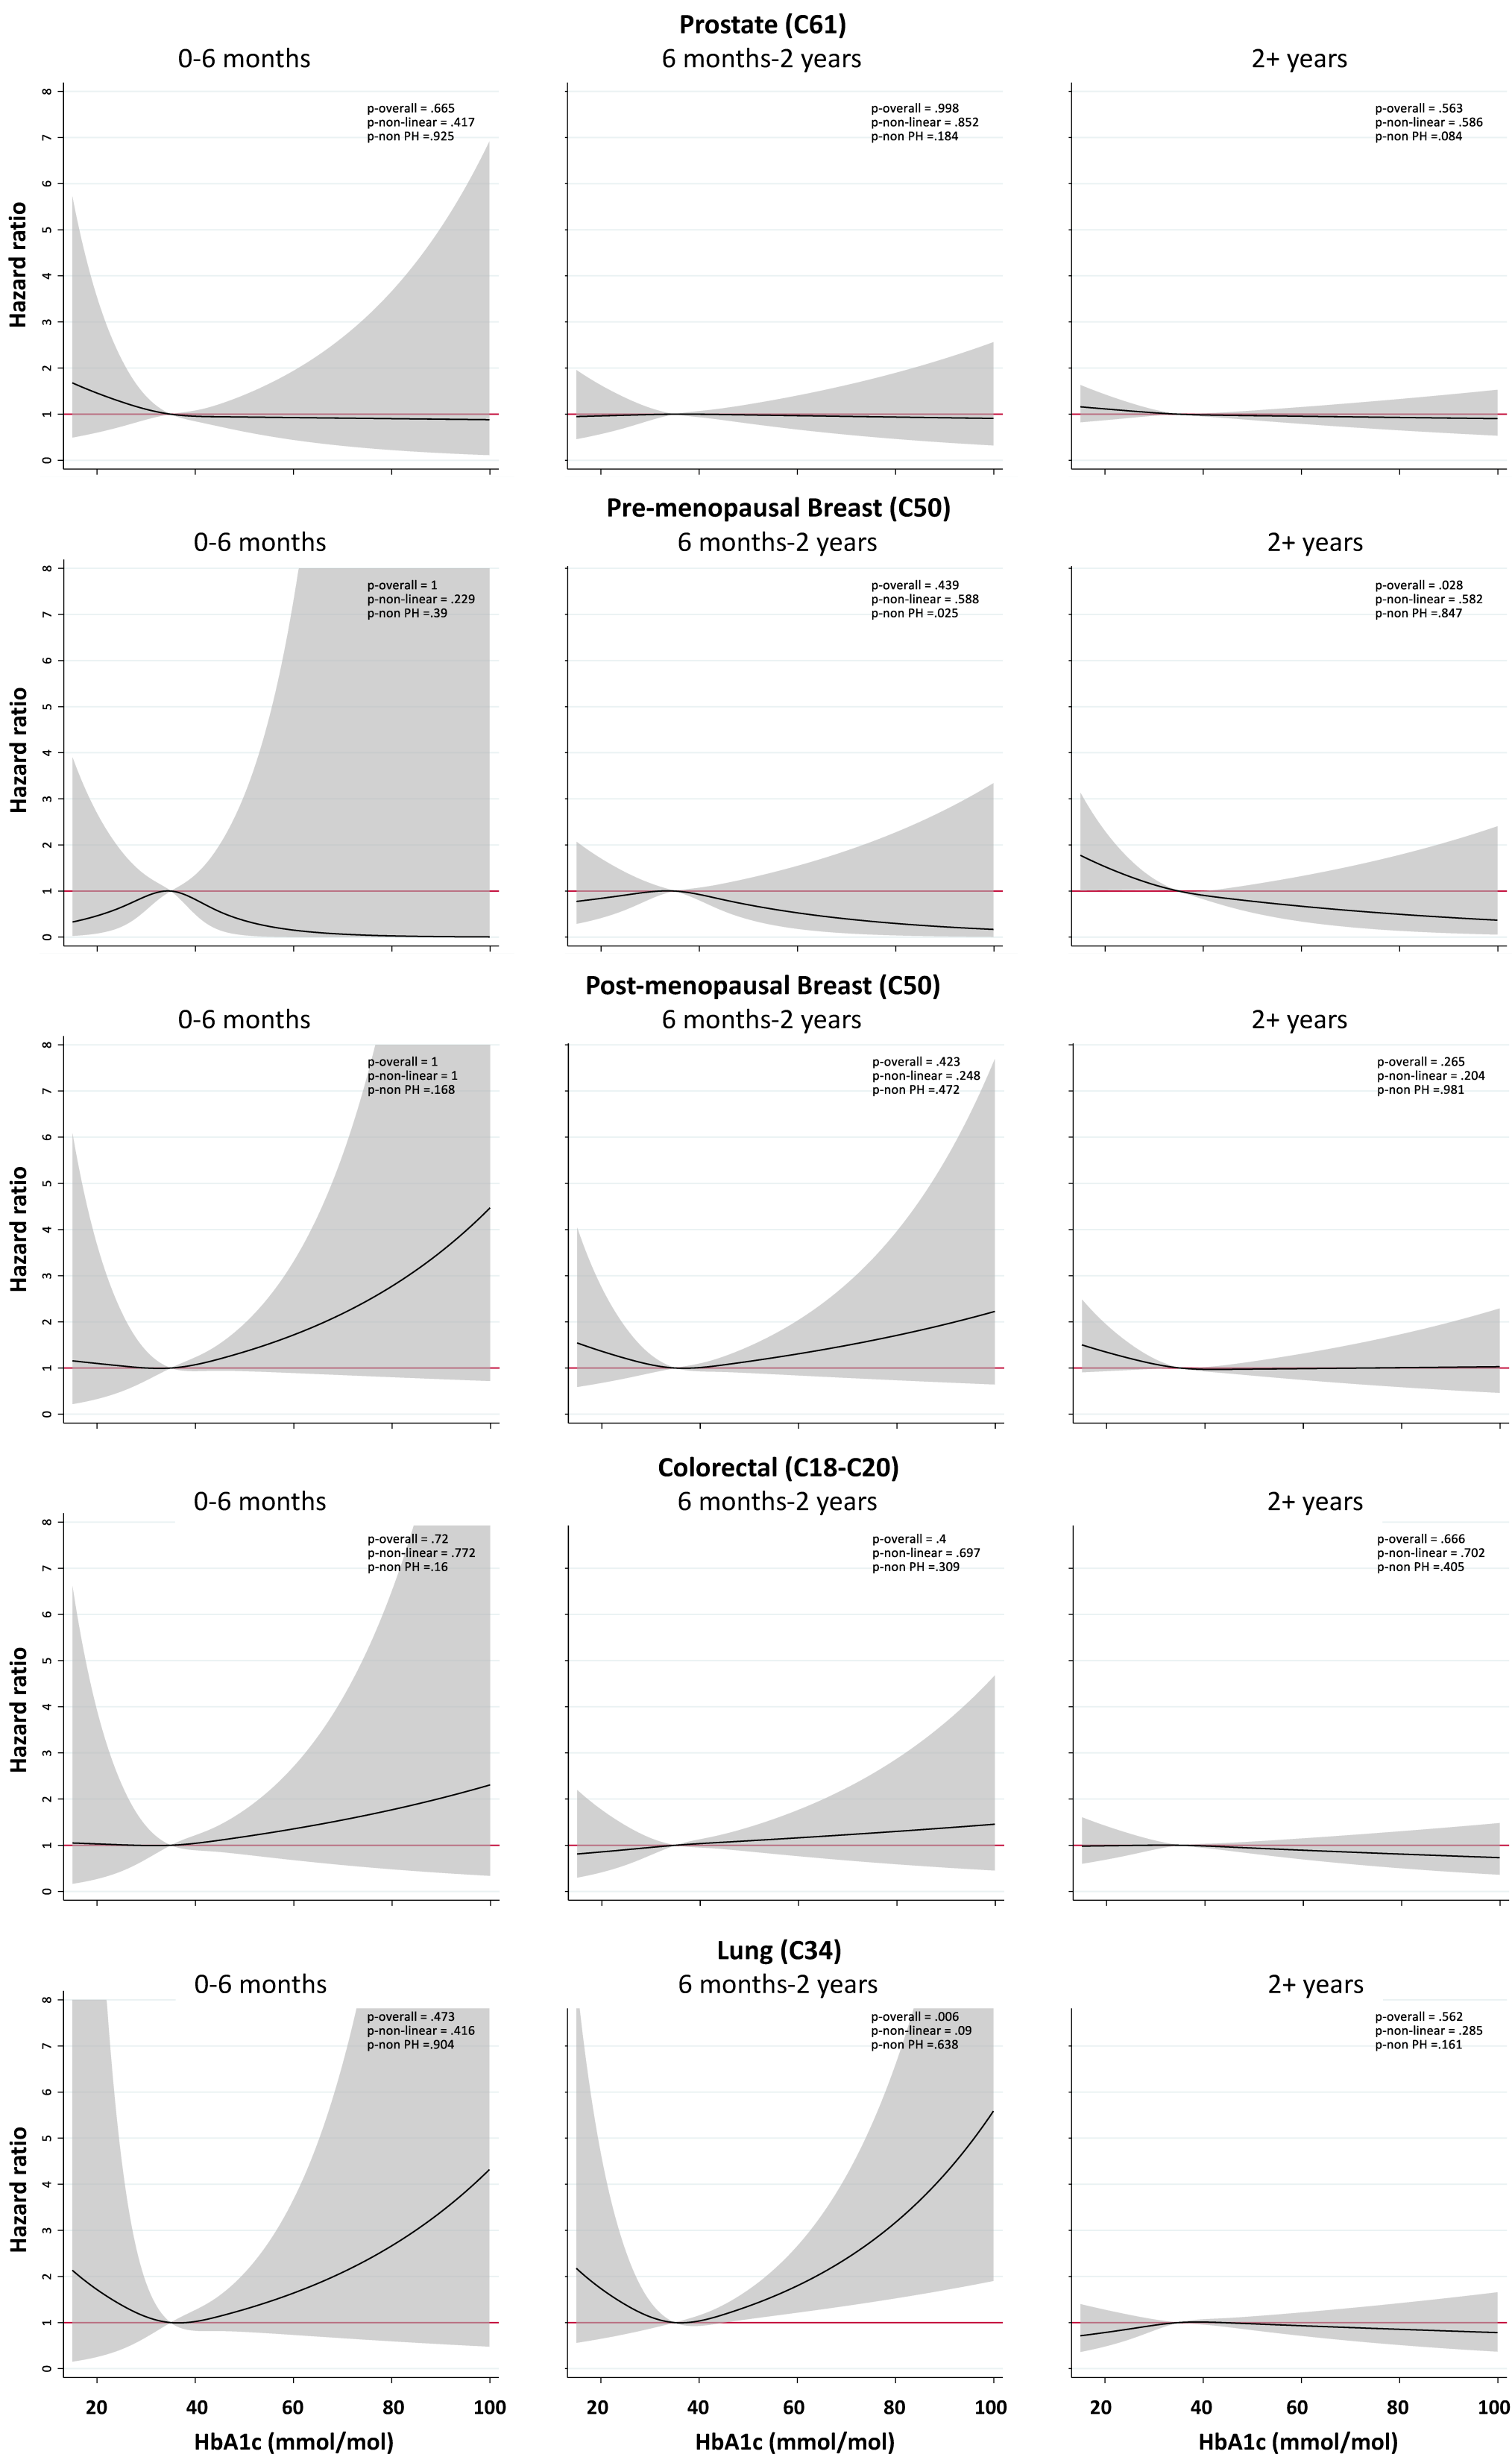



**Figure S5** Associations between glycated haemoglobin (HbA1c) and incidence of primary cancer outcomes, by time since baseline, excluding participants who reported diabetes diagnosis or metformin exposure at baseline

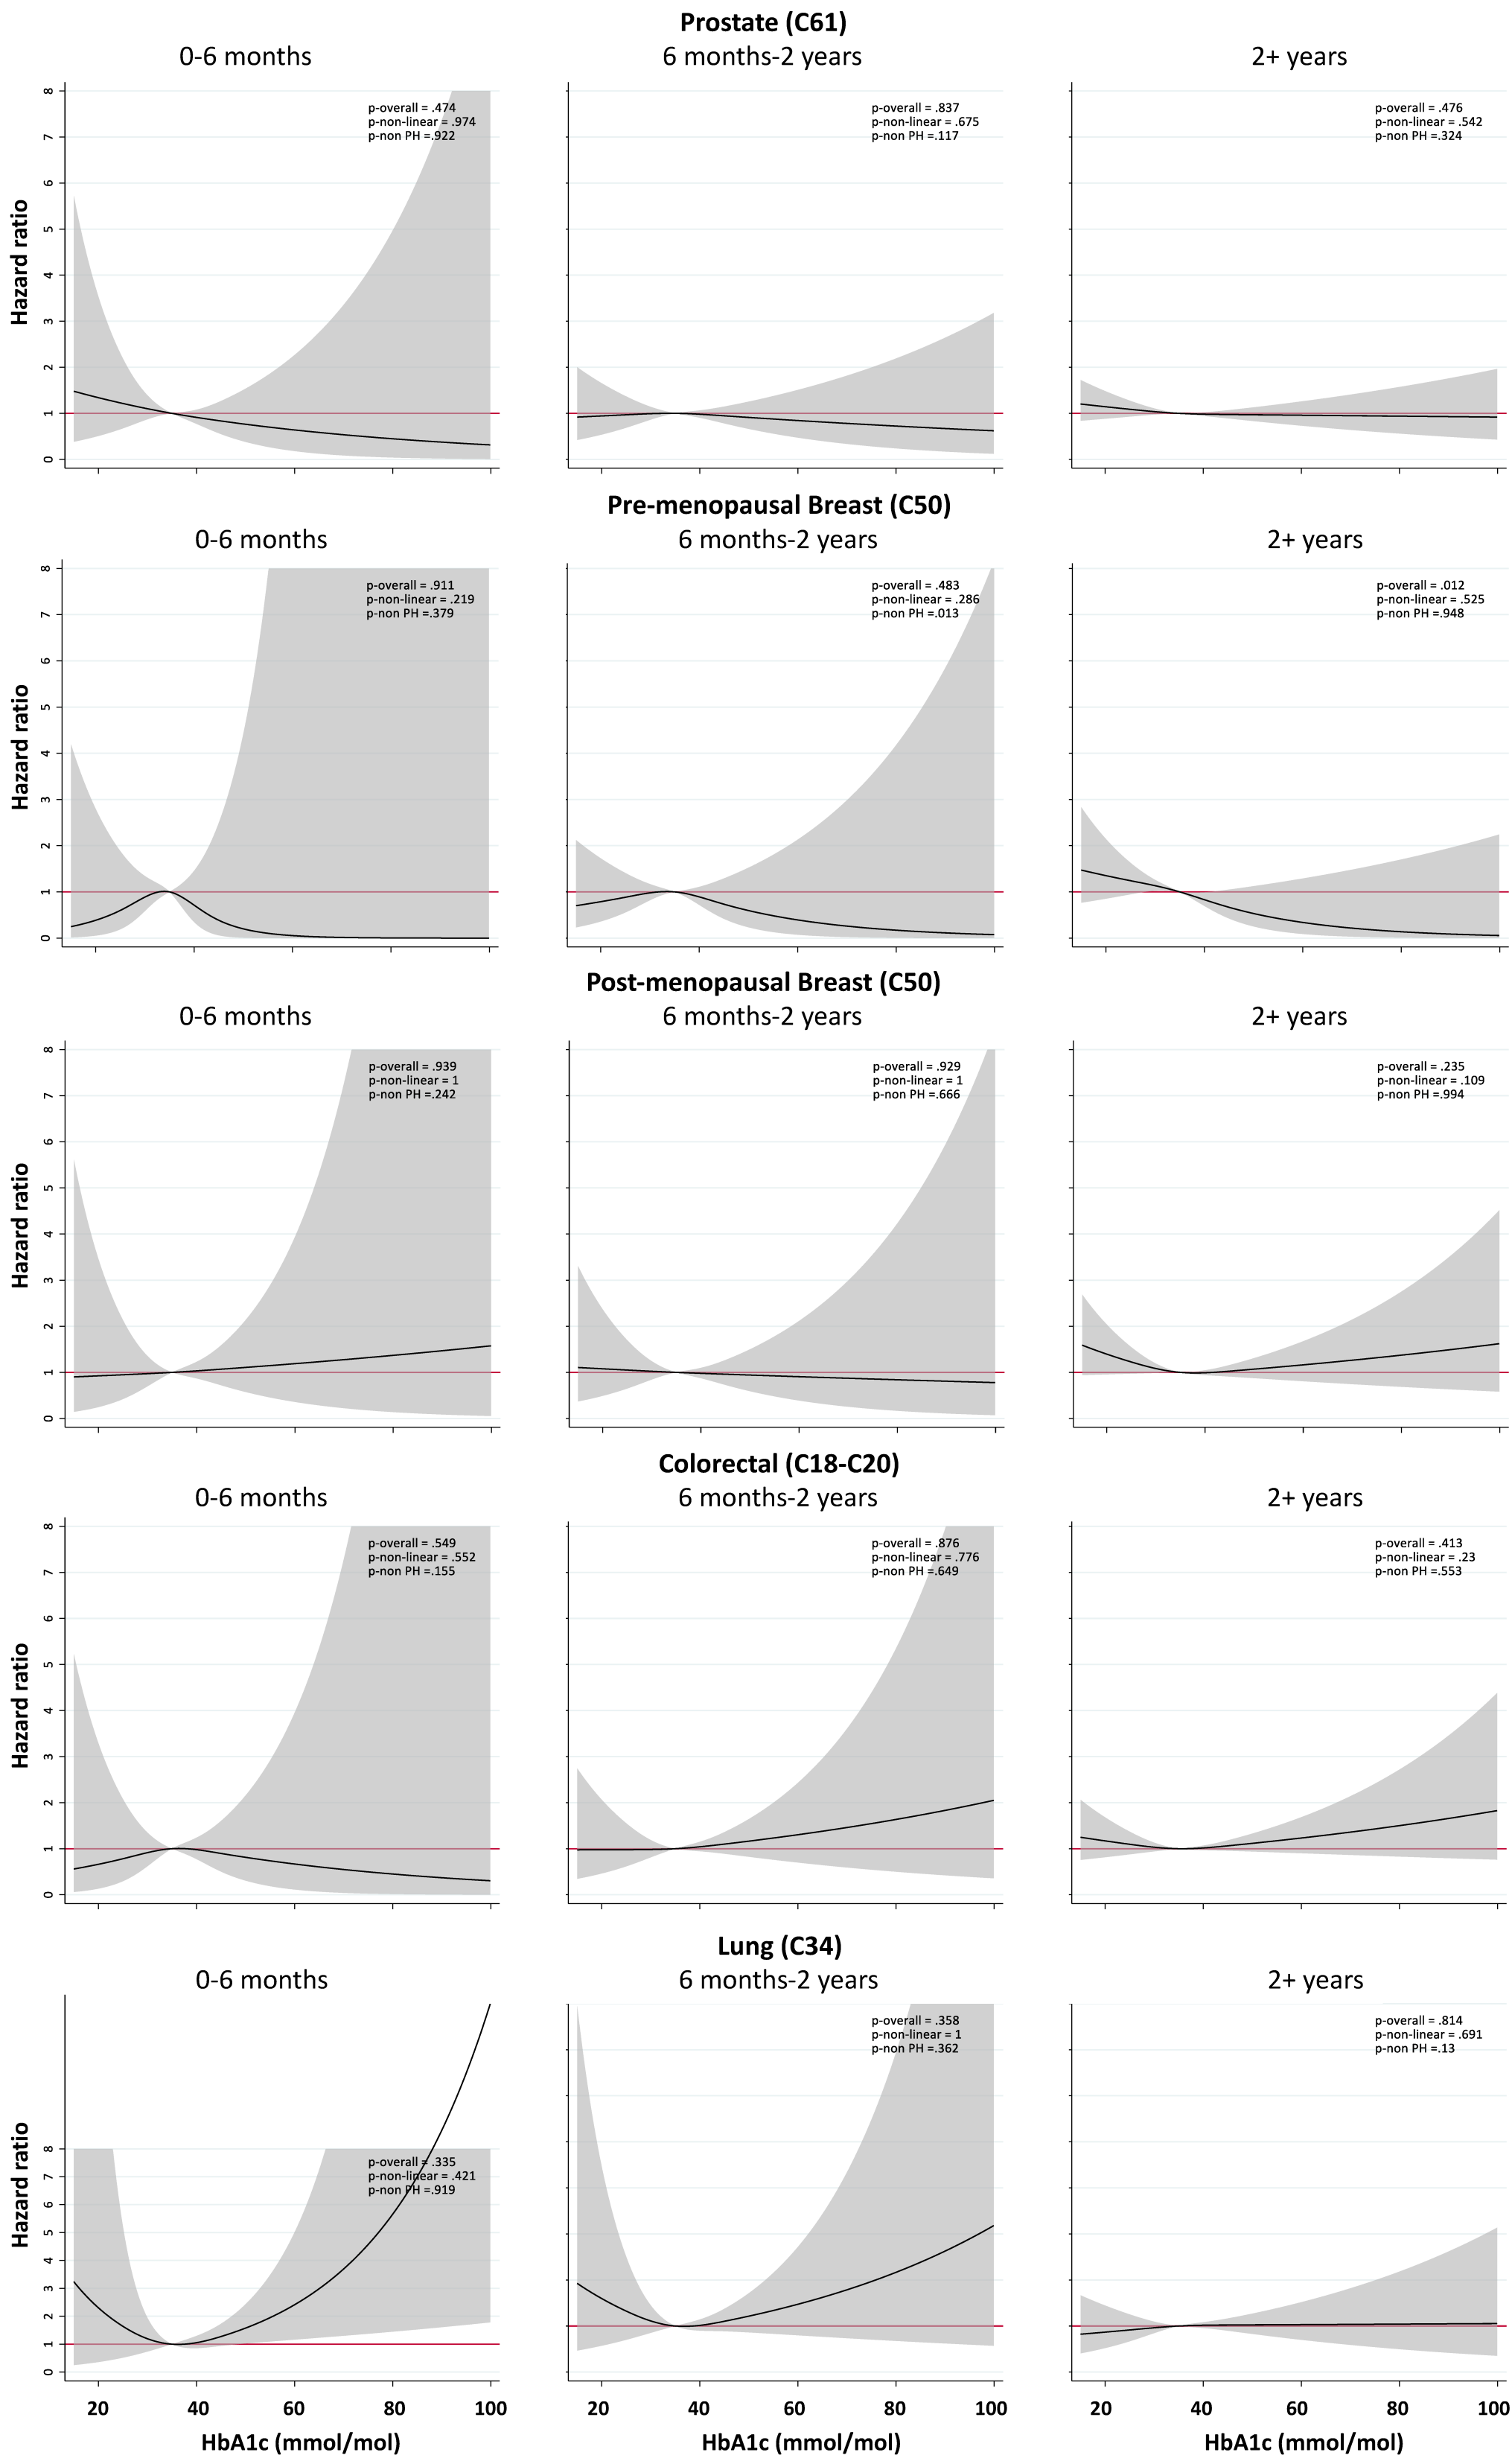

**Figure S6** Prostate cancer and HbA1c at each additional confounder adjustment stage

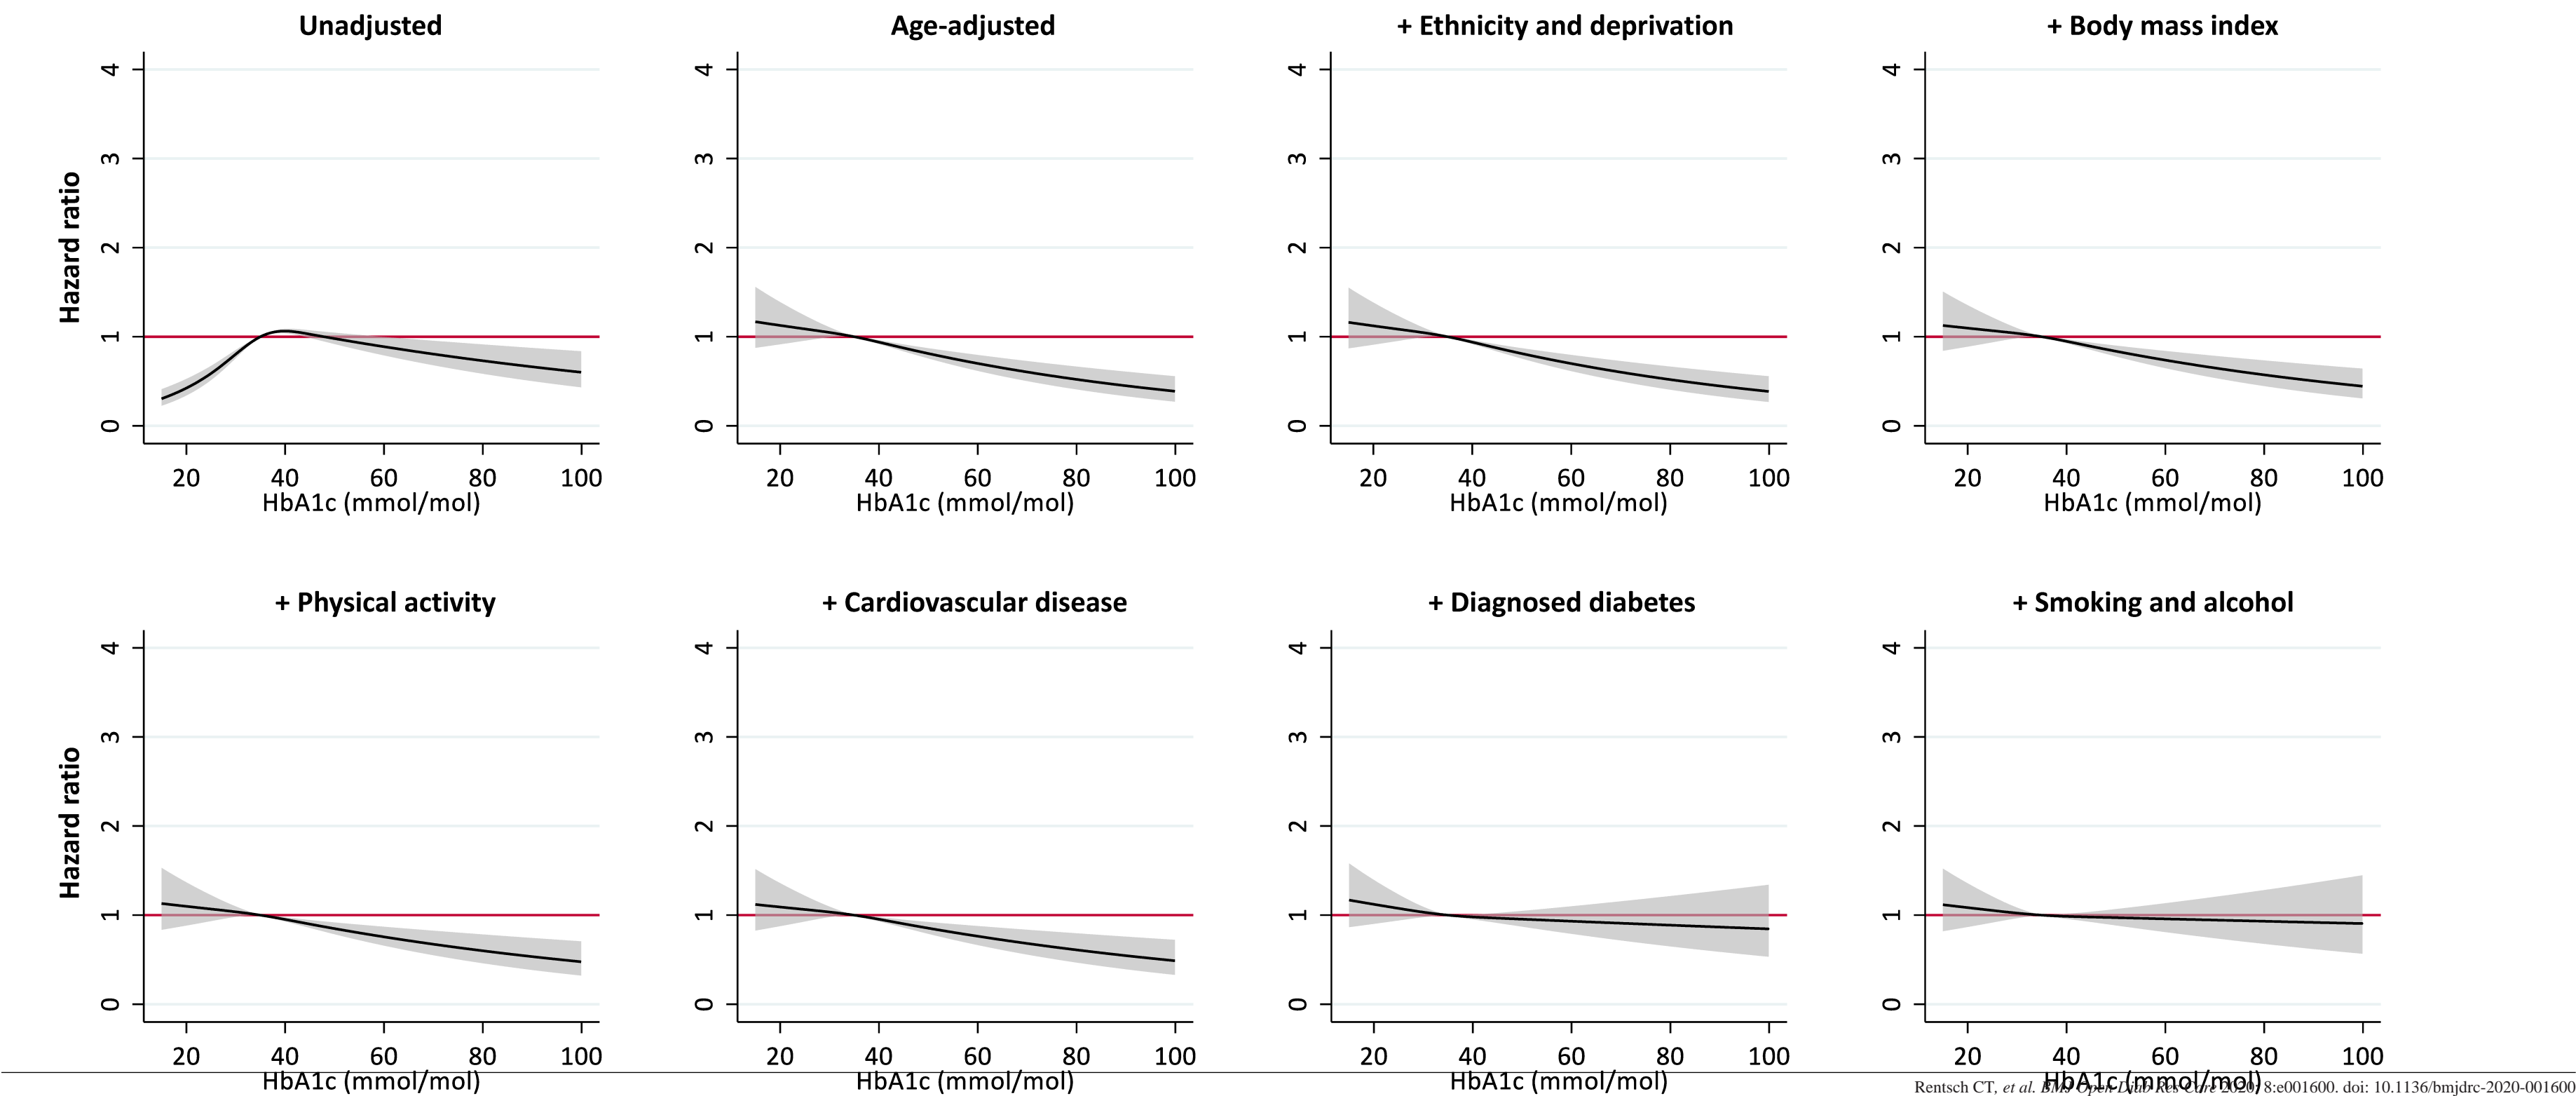

**Figure S7** Pre-menopausal breast cancer and HbA1c at each additional confounder adjustment stage

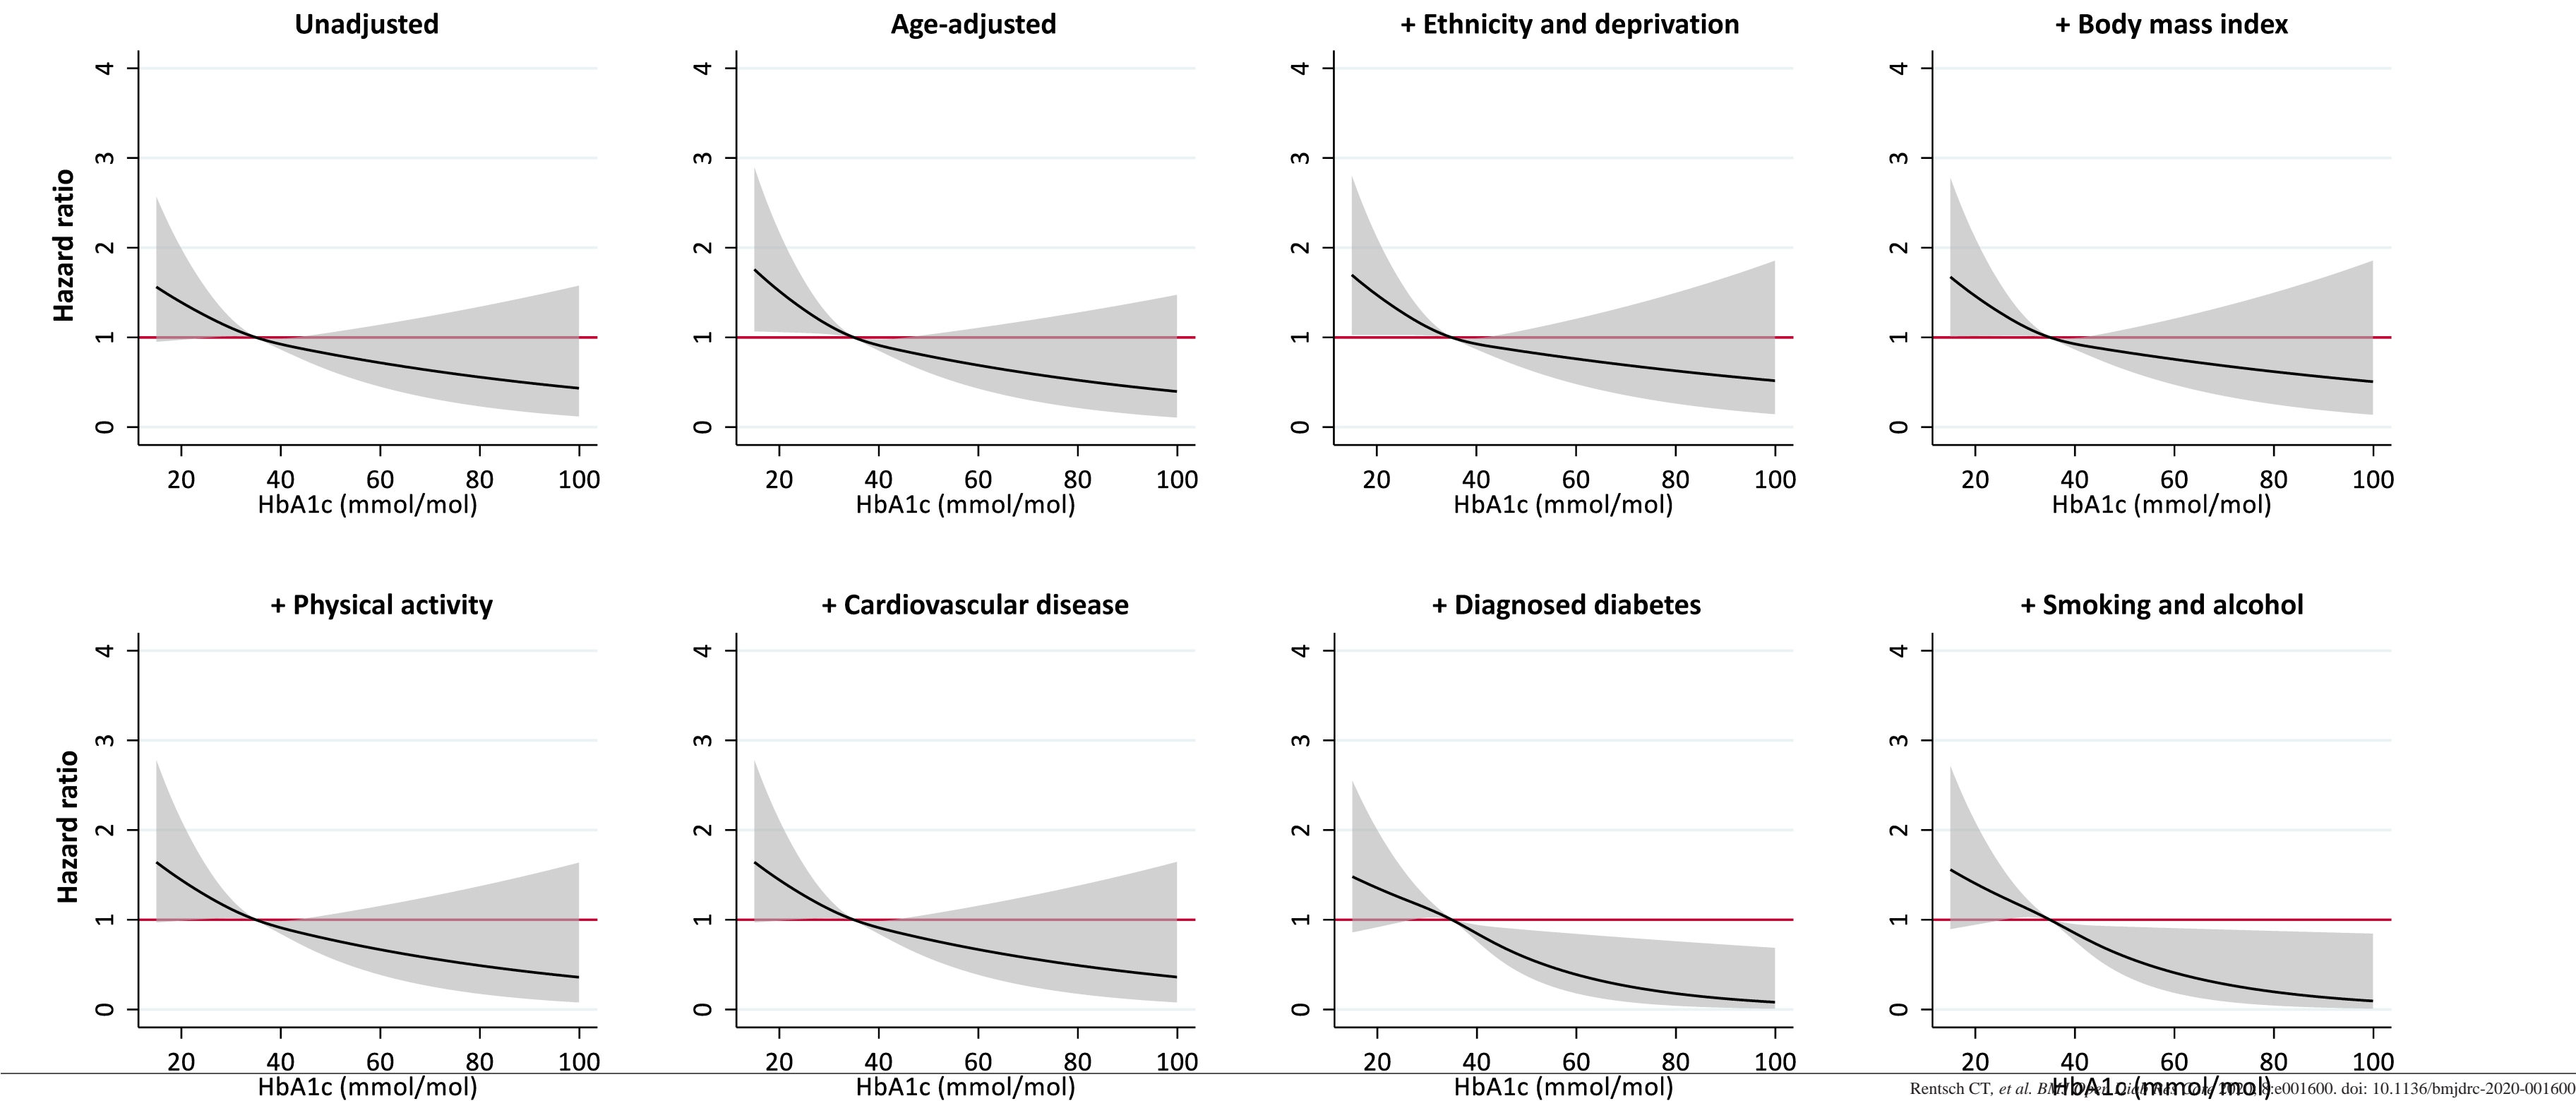

**Figure S8** Post-menopausal breast cancer and HbA1c at each additional confounder adjustment stage

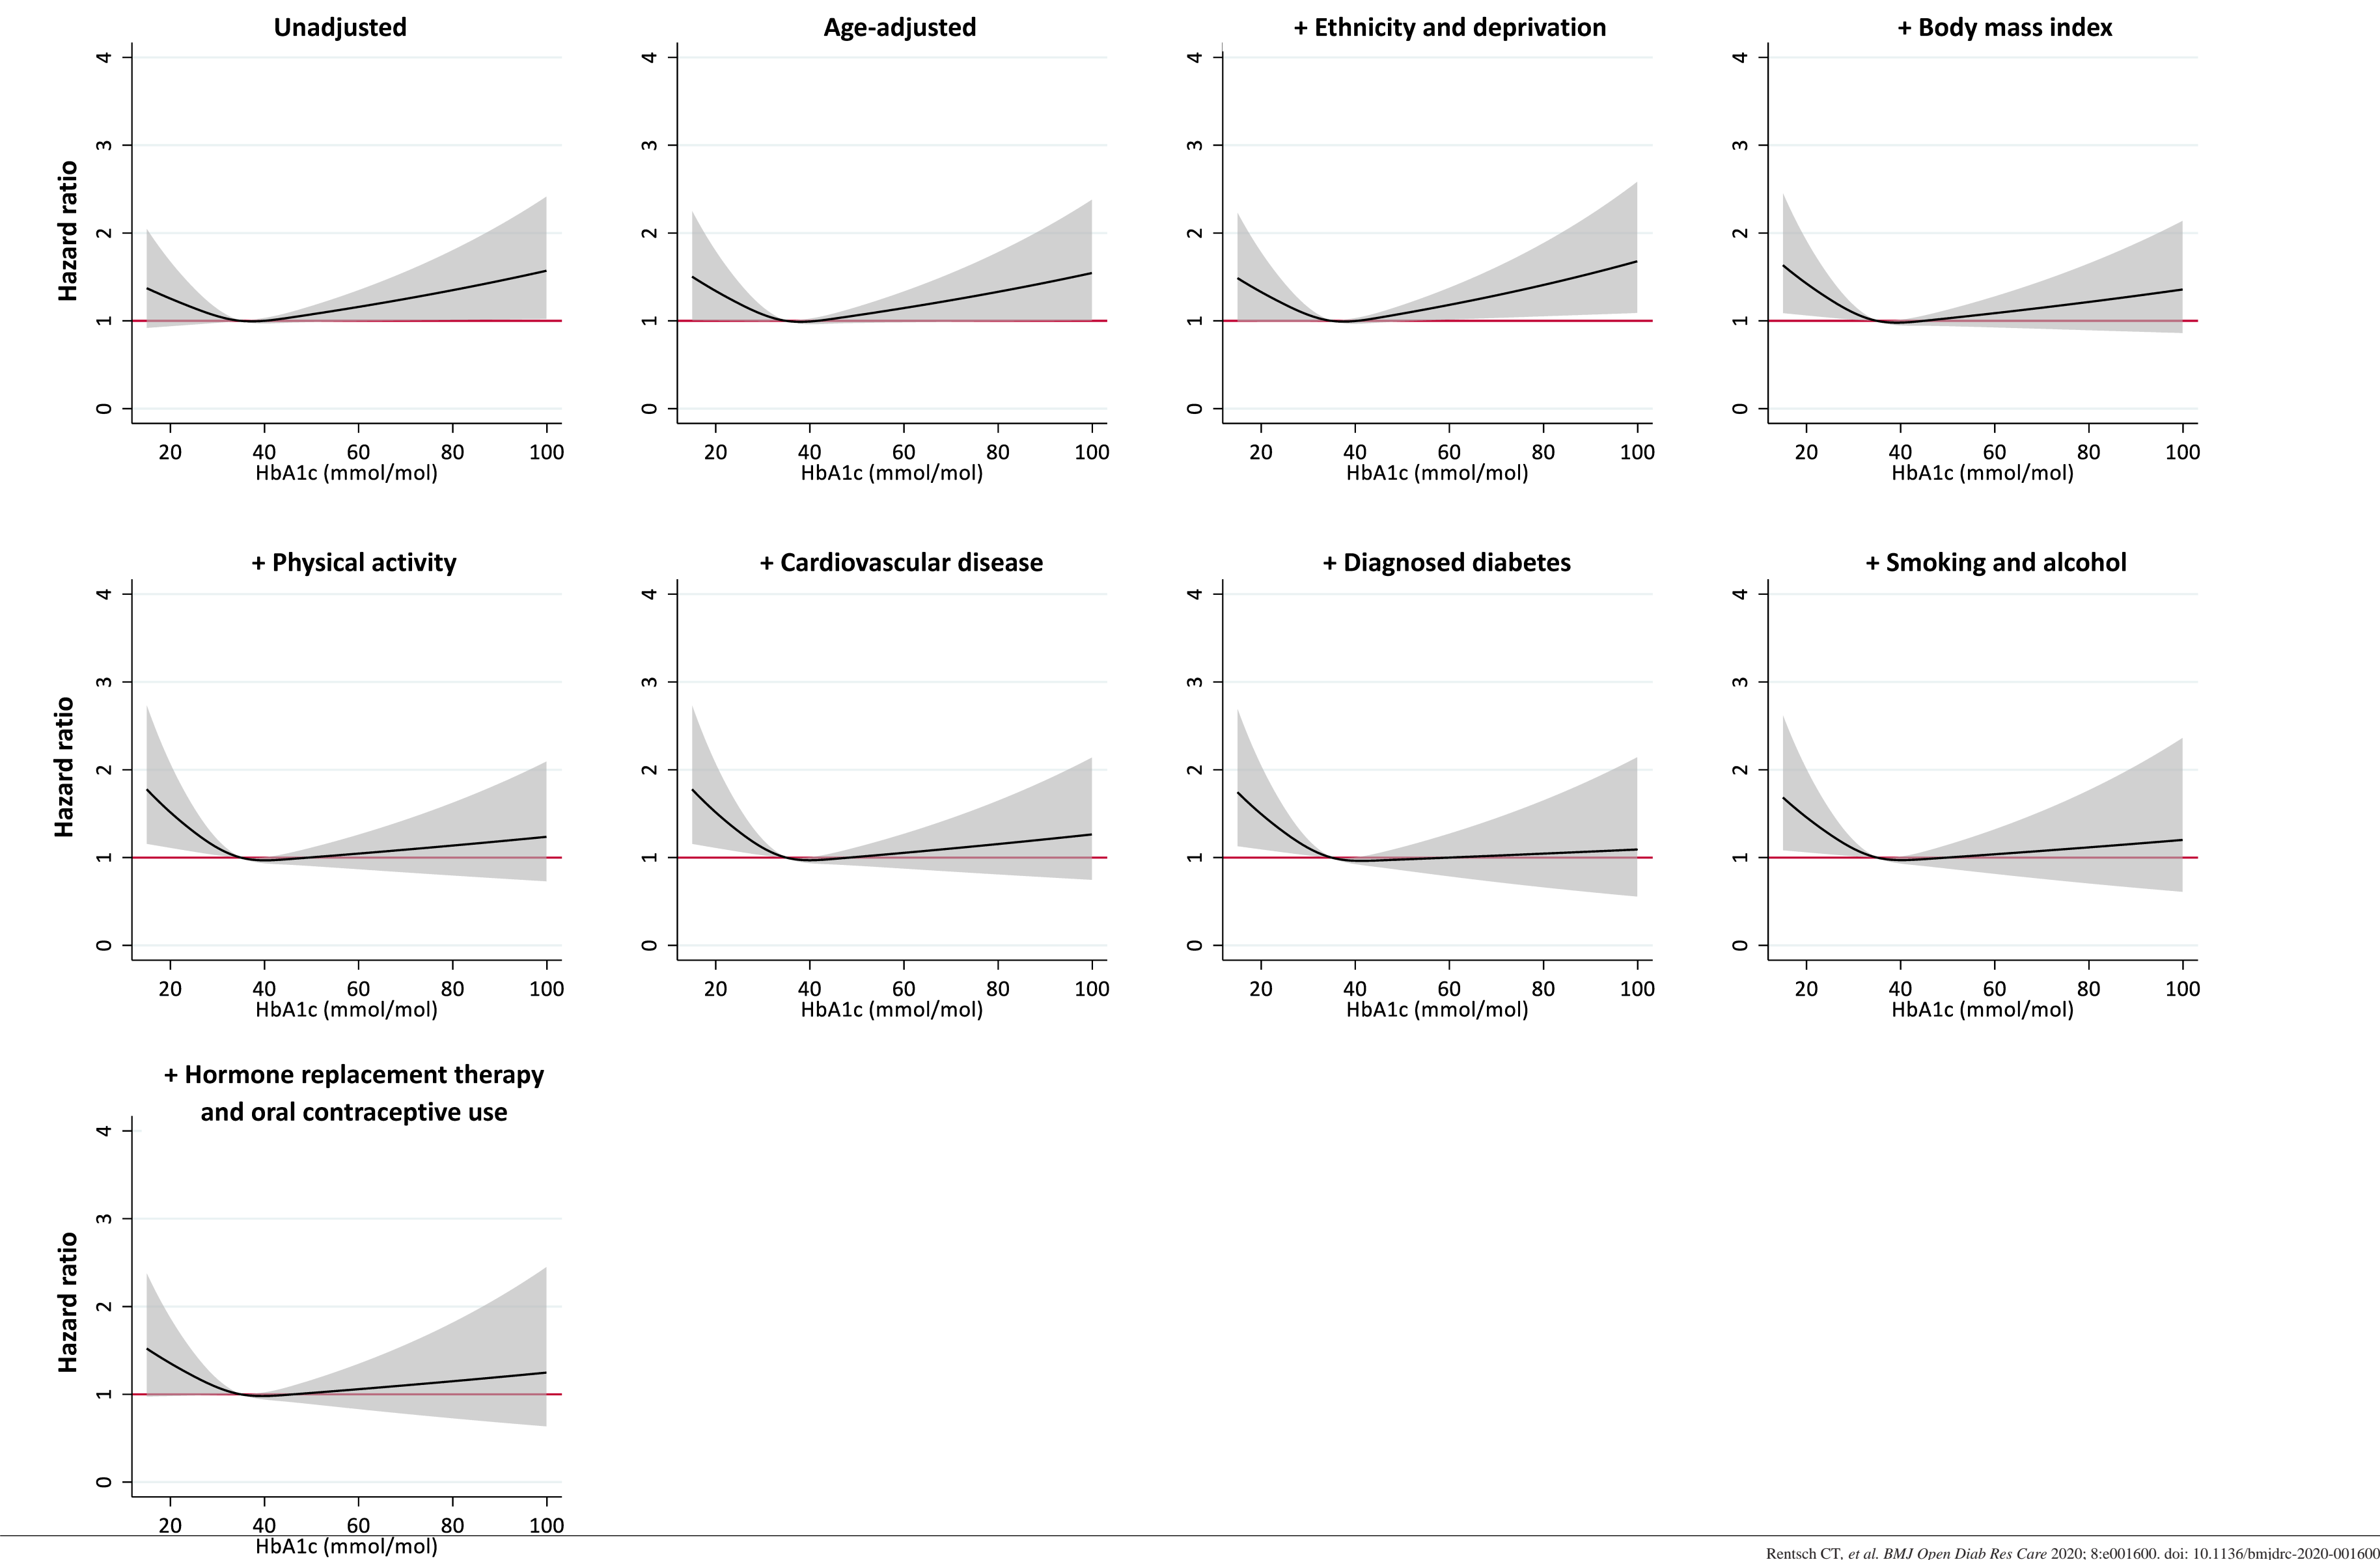

**Figure S9** Colorectal cancer and HbA1c at each additional confounder adjustment stage

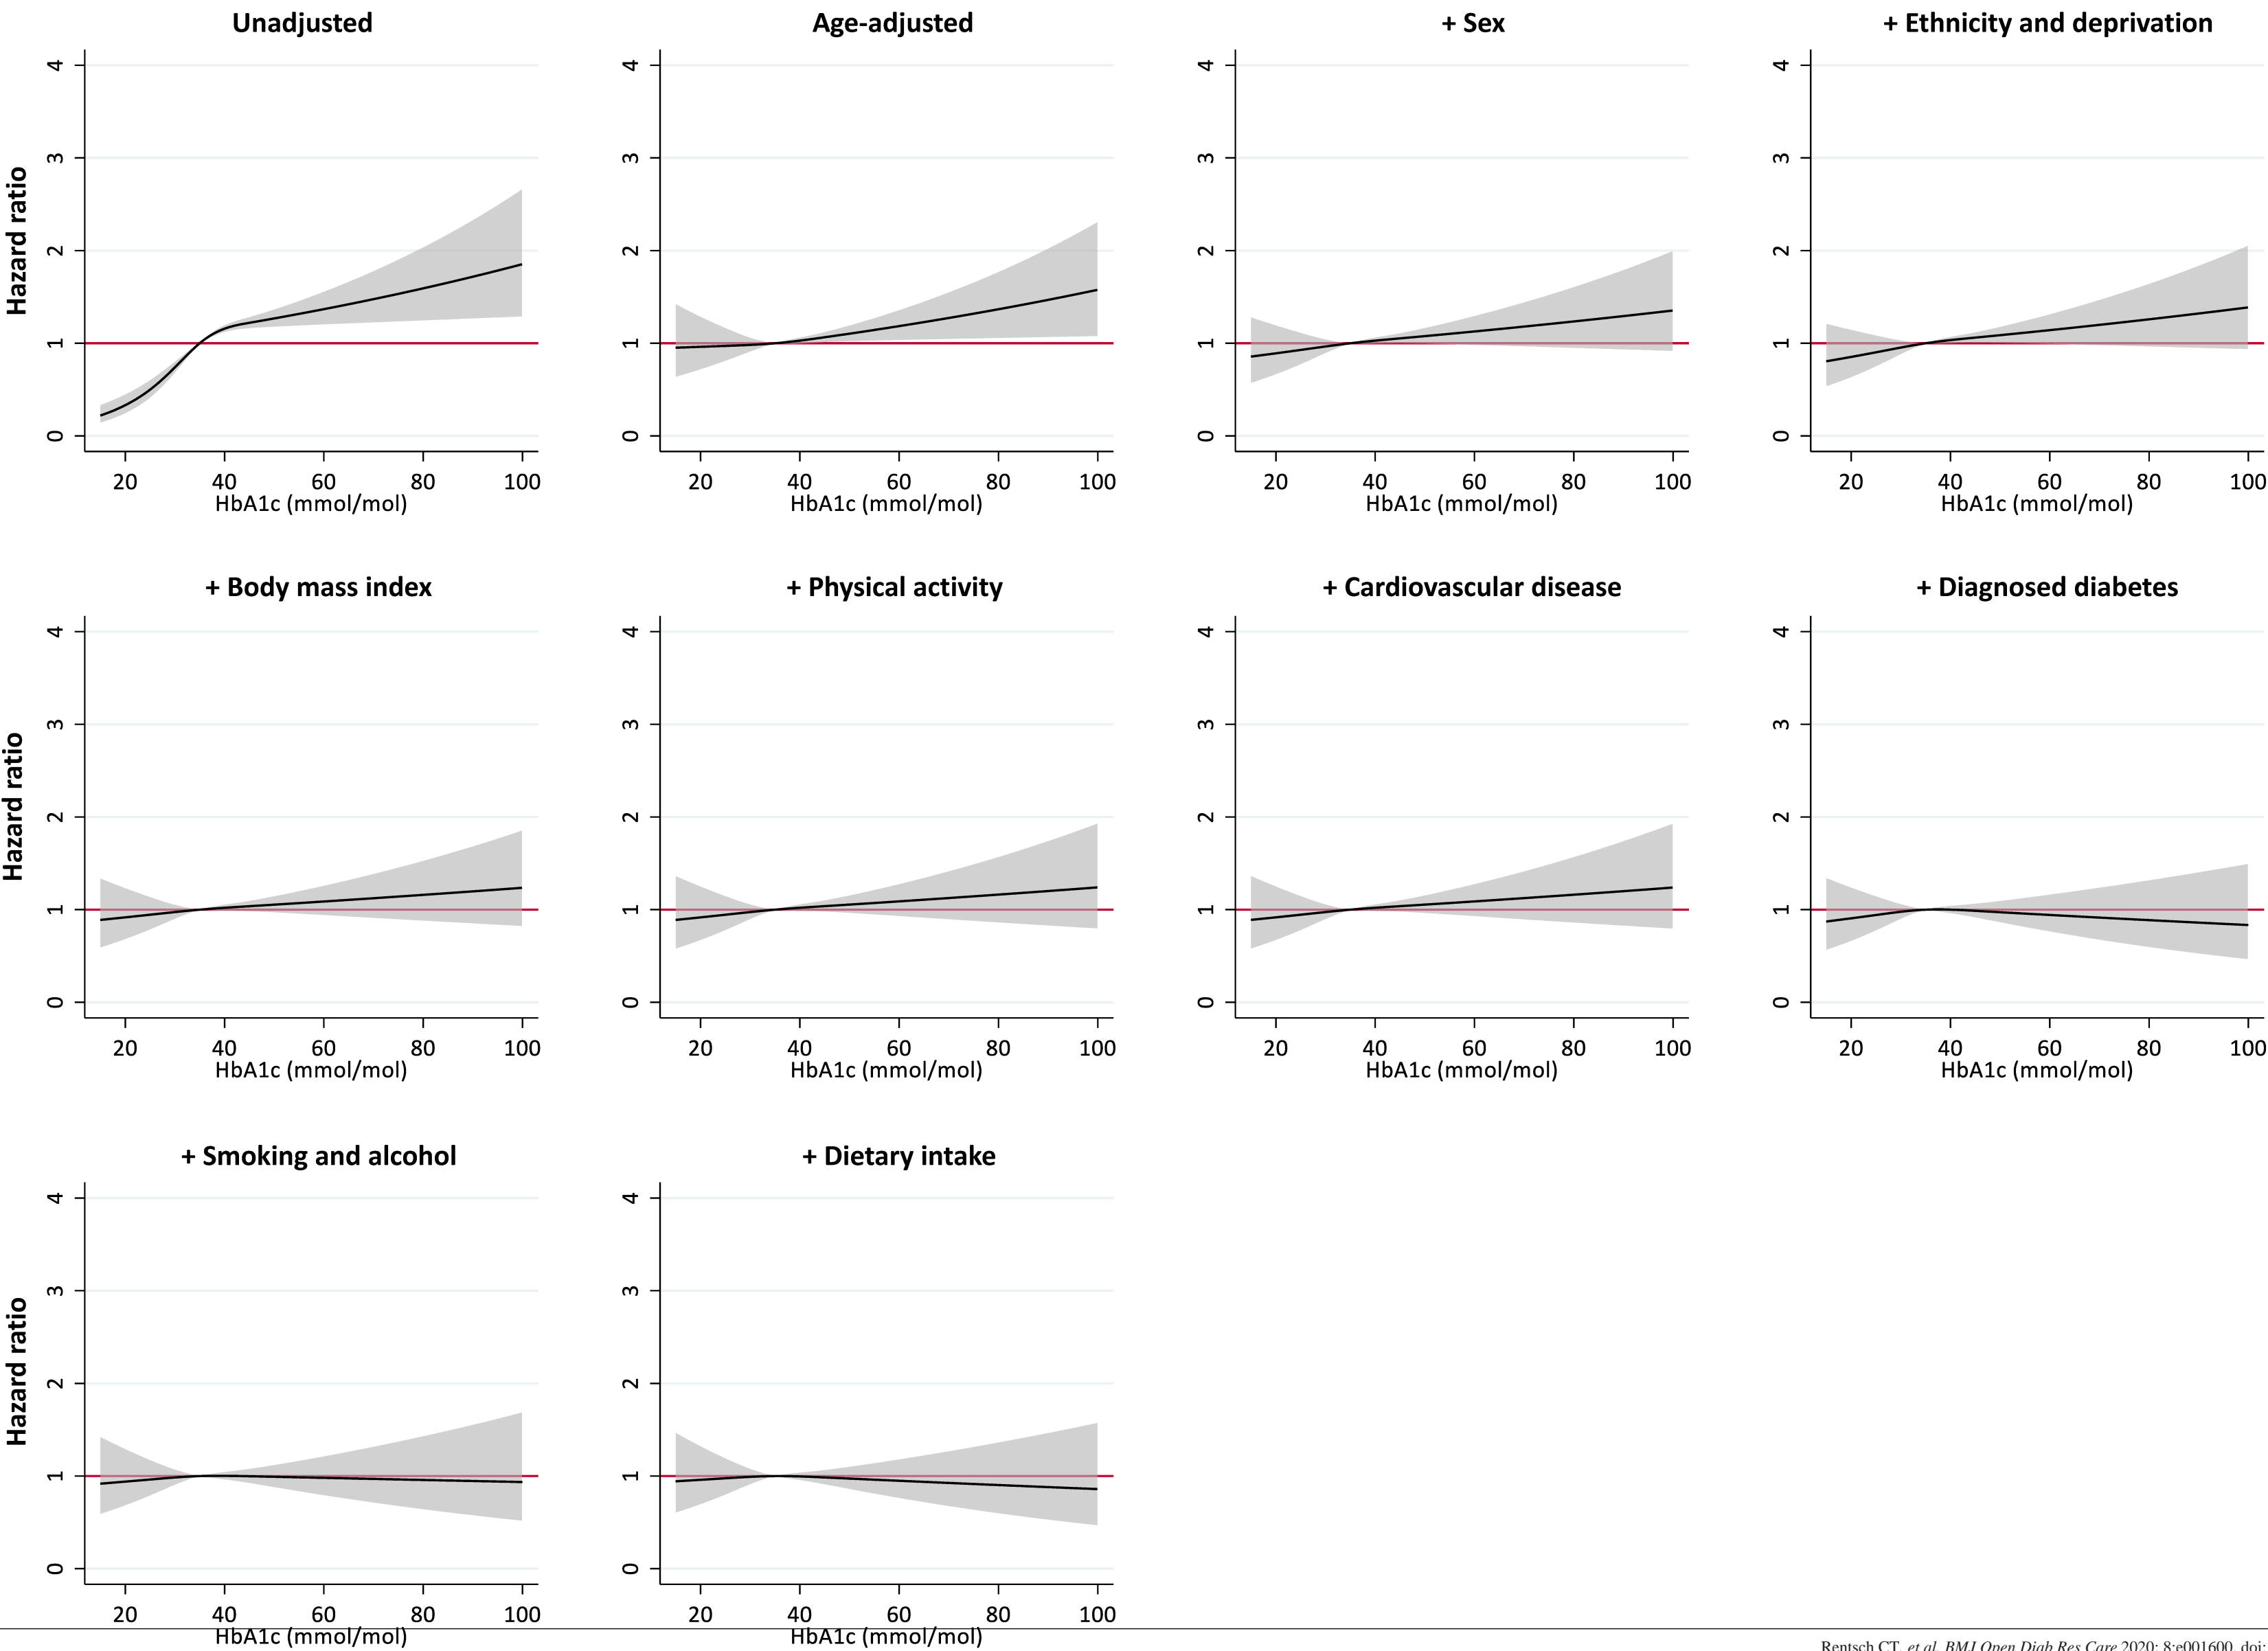

**Figure S10** Lung cancer and HbA1c at each additional confounder adjustment stage

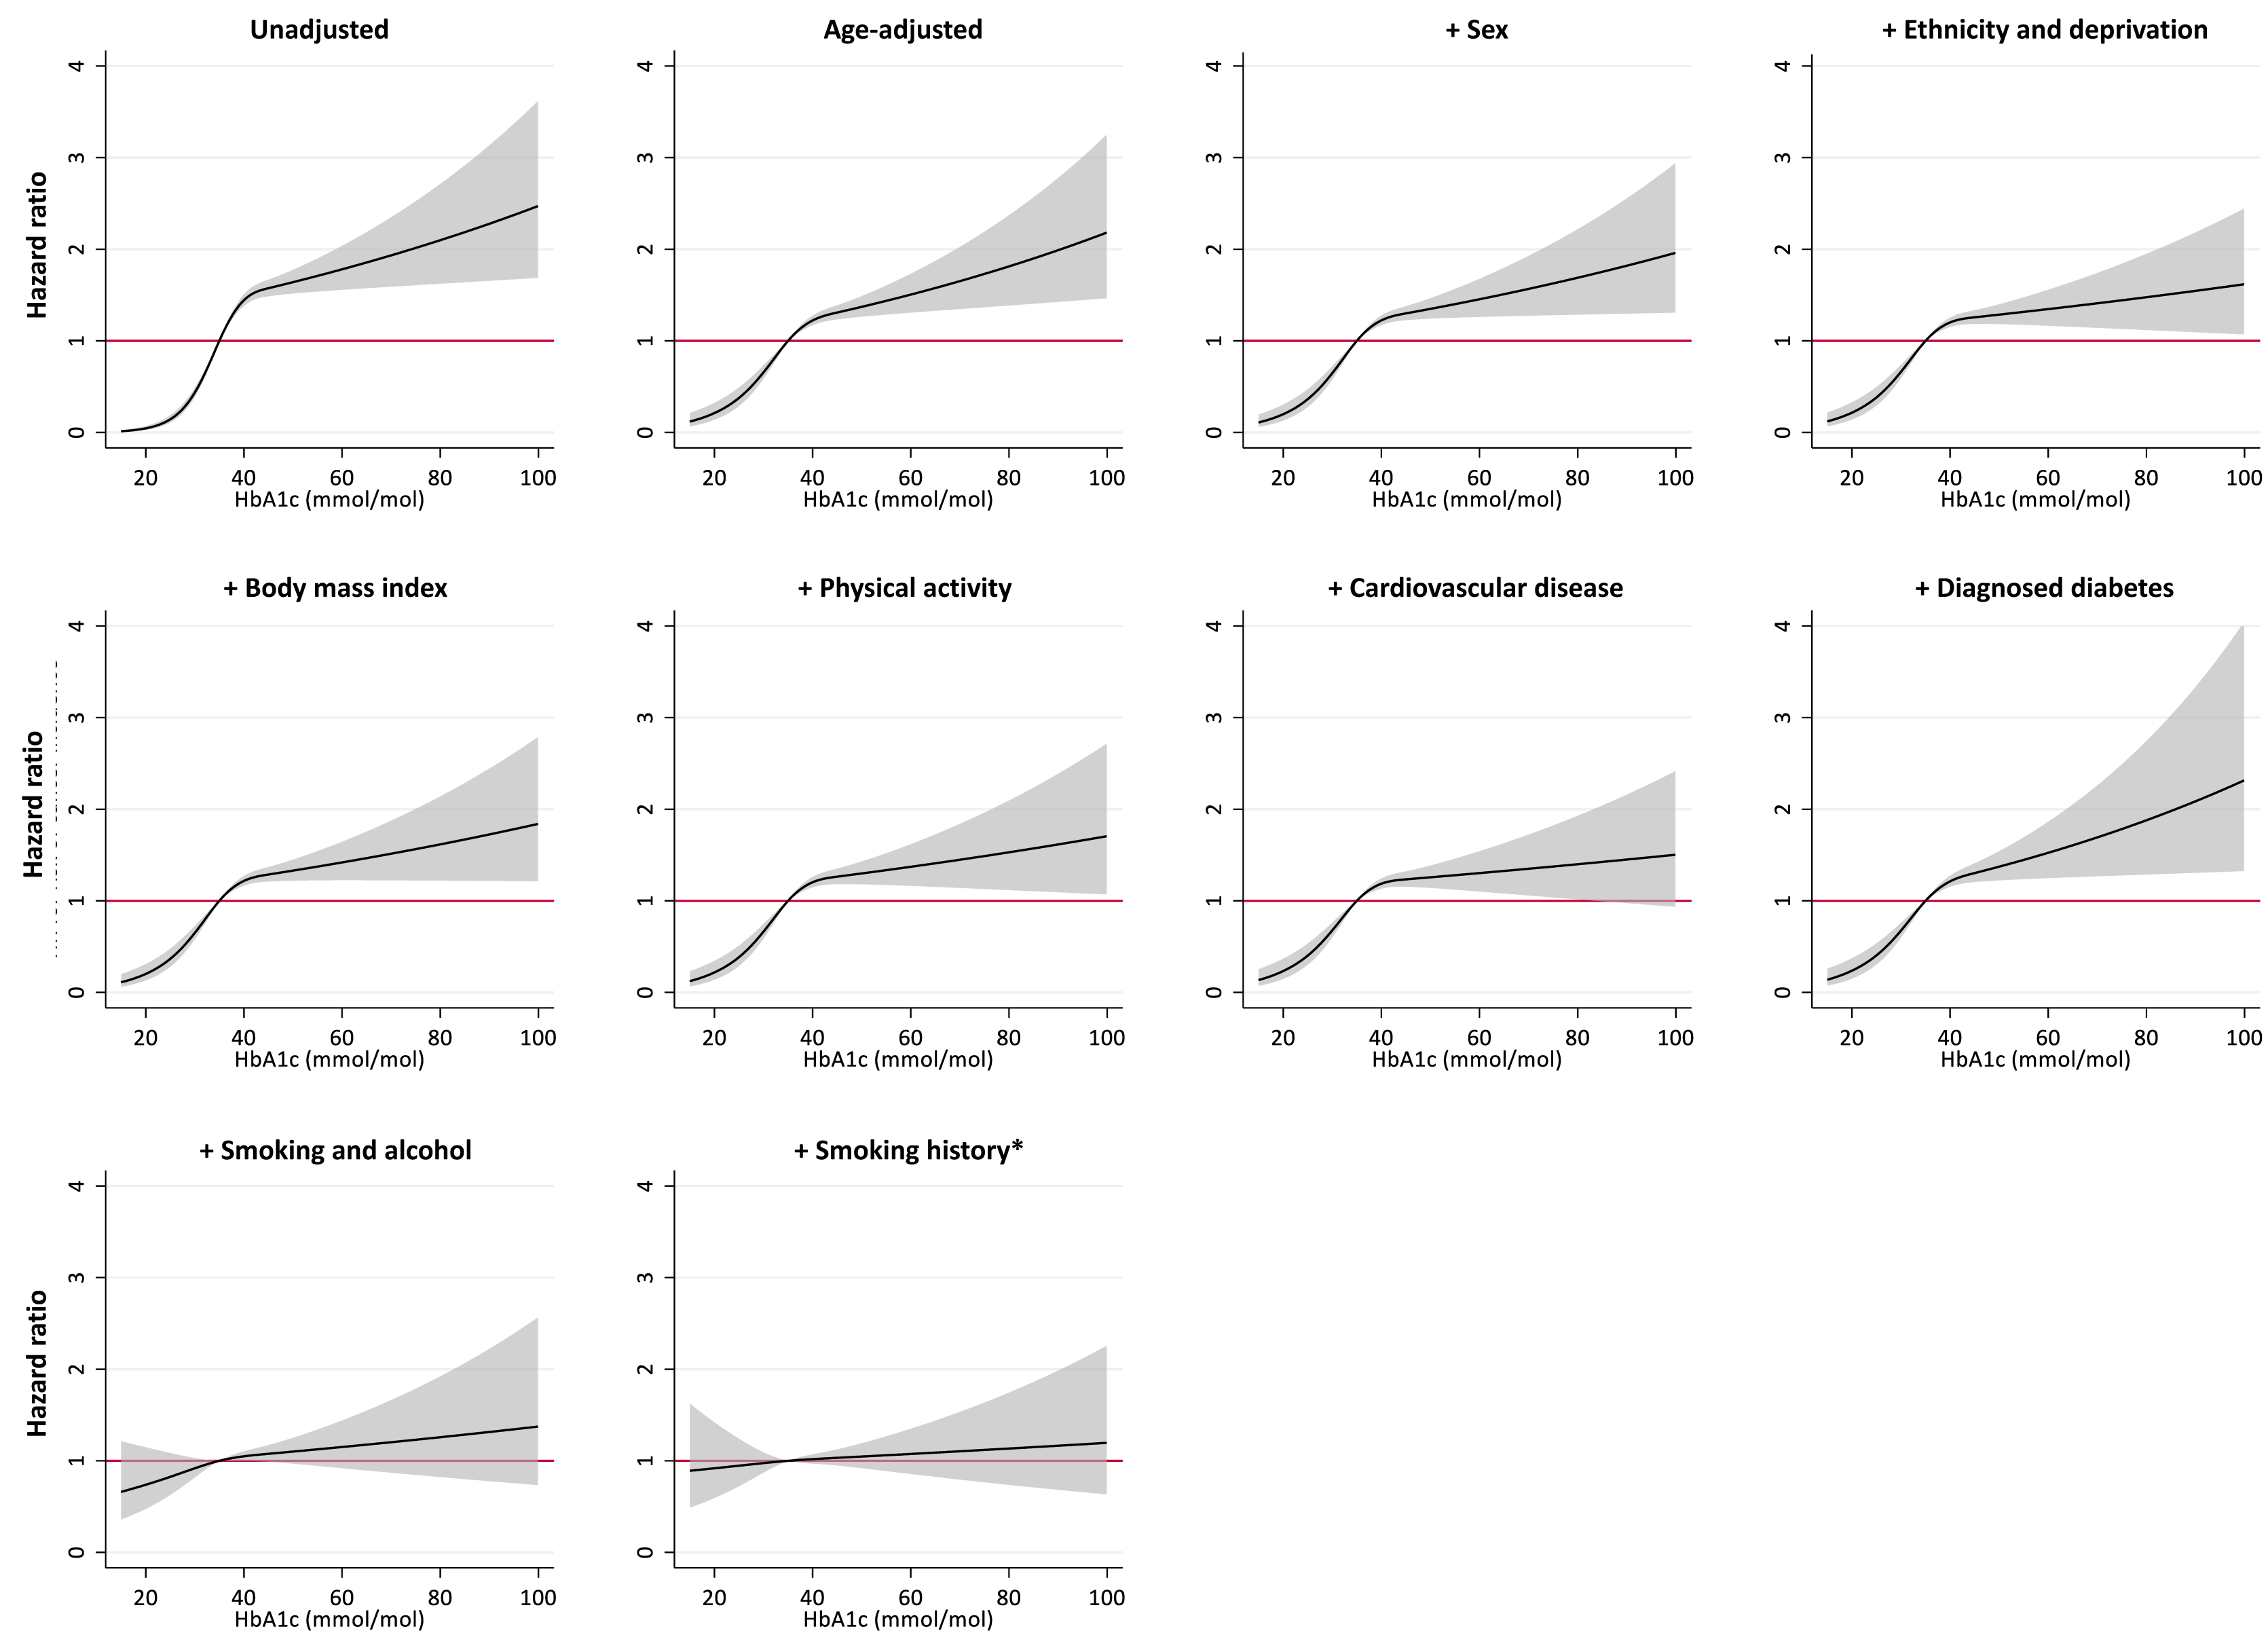

\*Additionally adjusted for age at start and stop of smoking among former smokers and rate of smoking among current smokers



**Figure S11** Association between baseline diagnosis of type 2 diabetes and cancer incidence in the UK Biobank

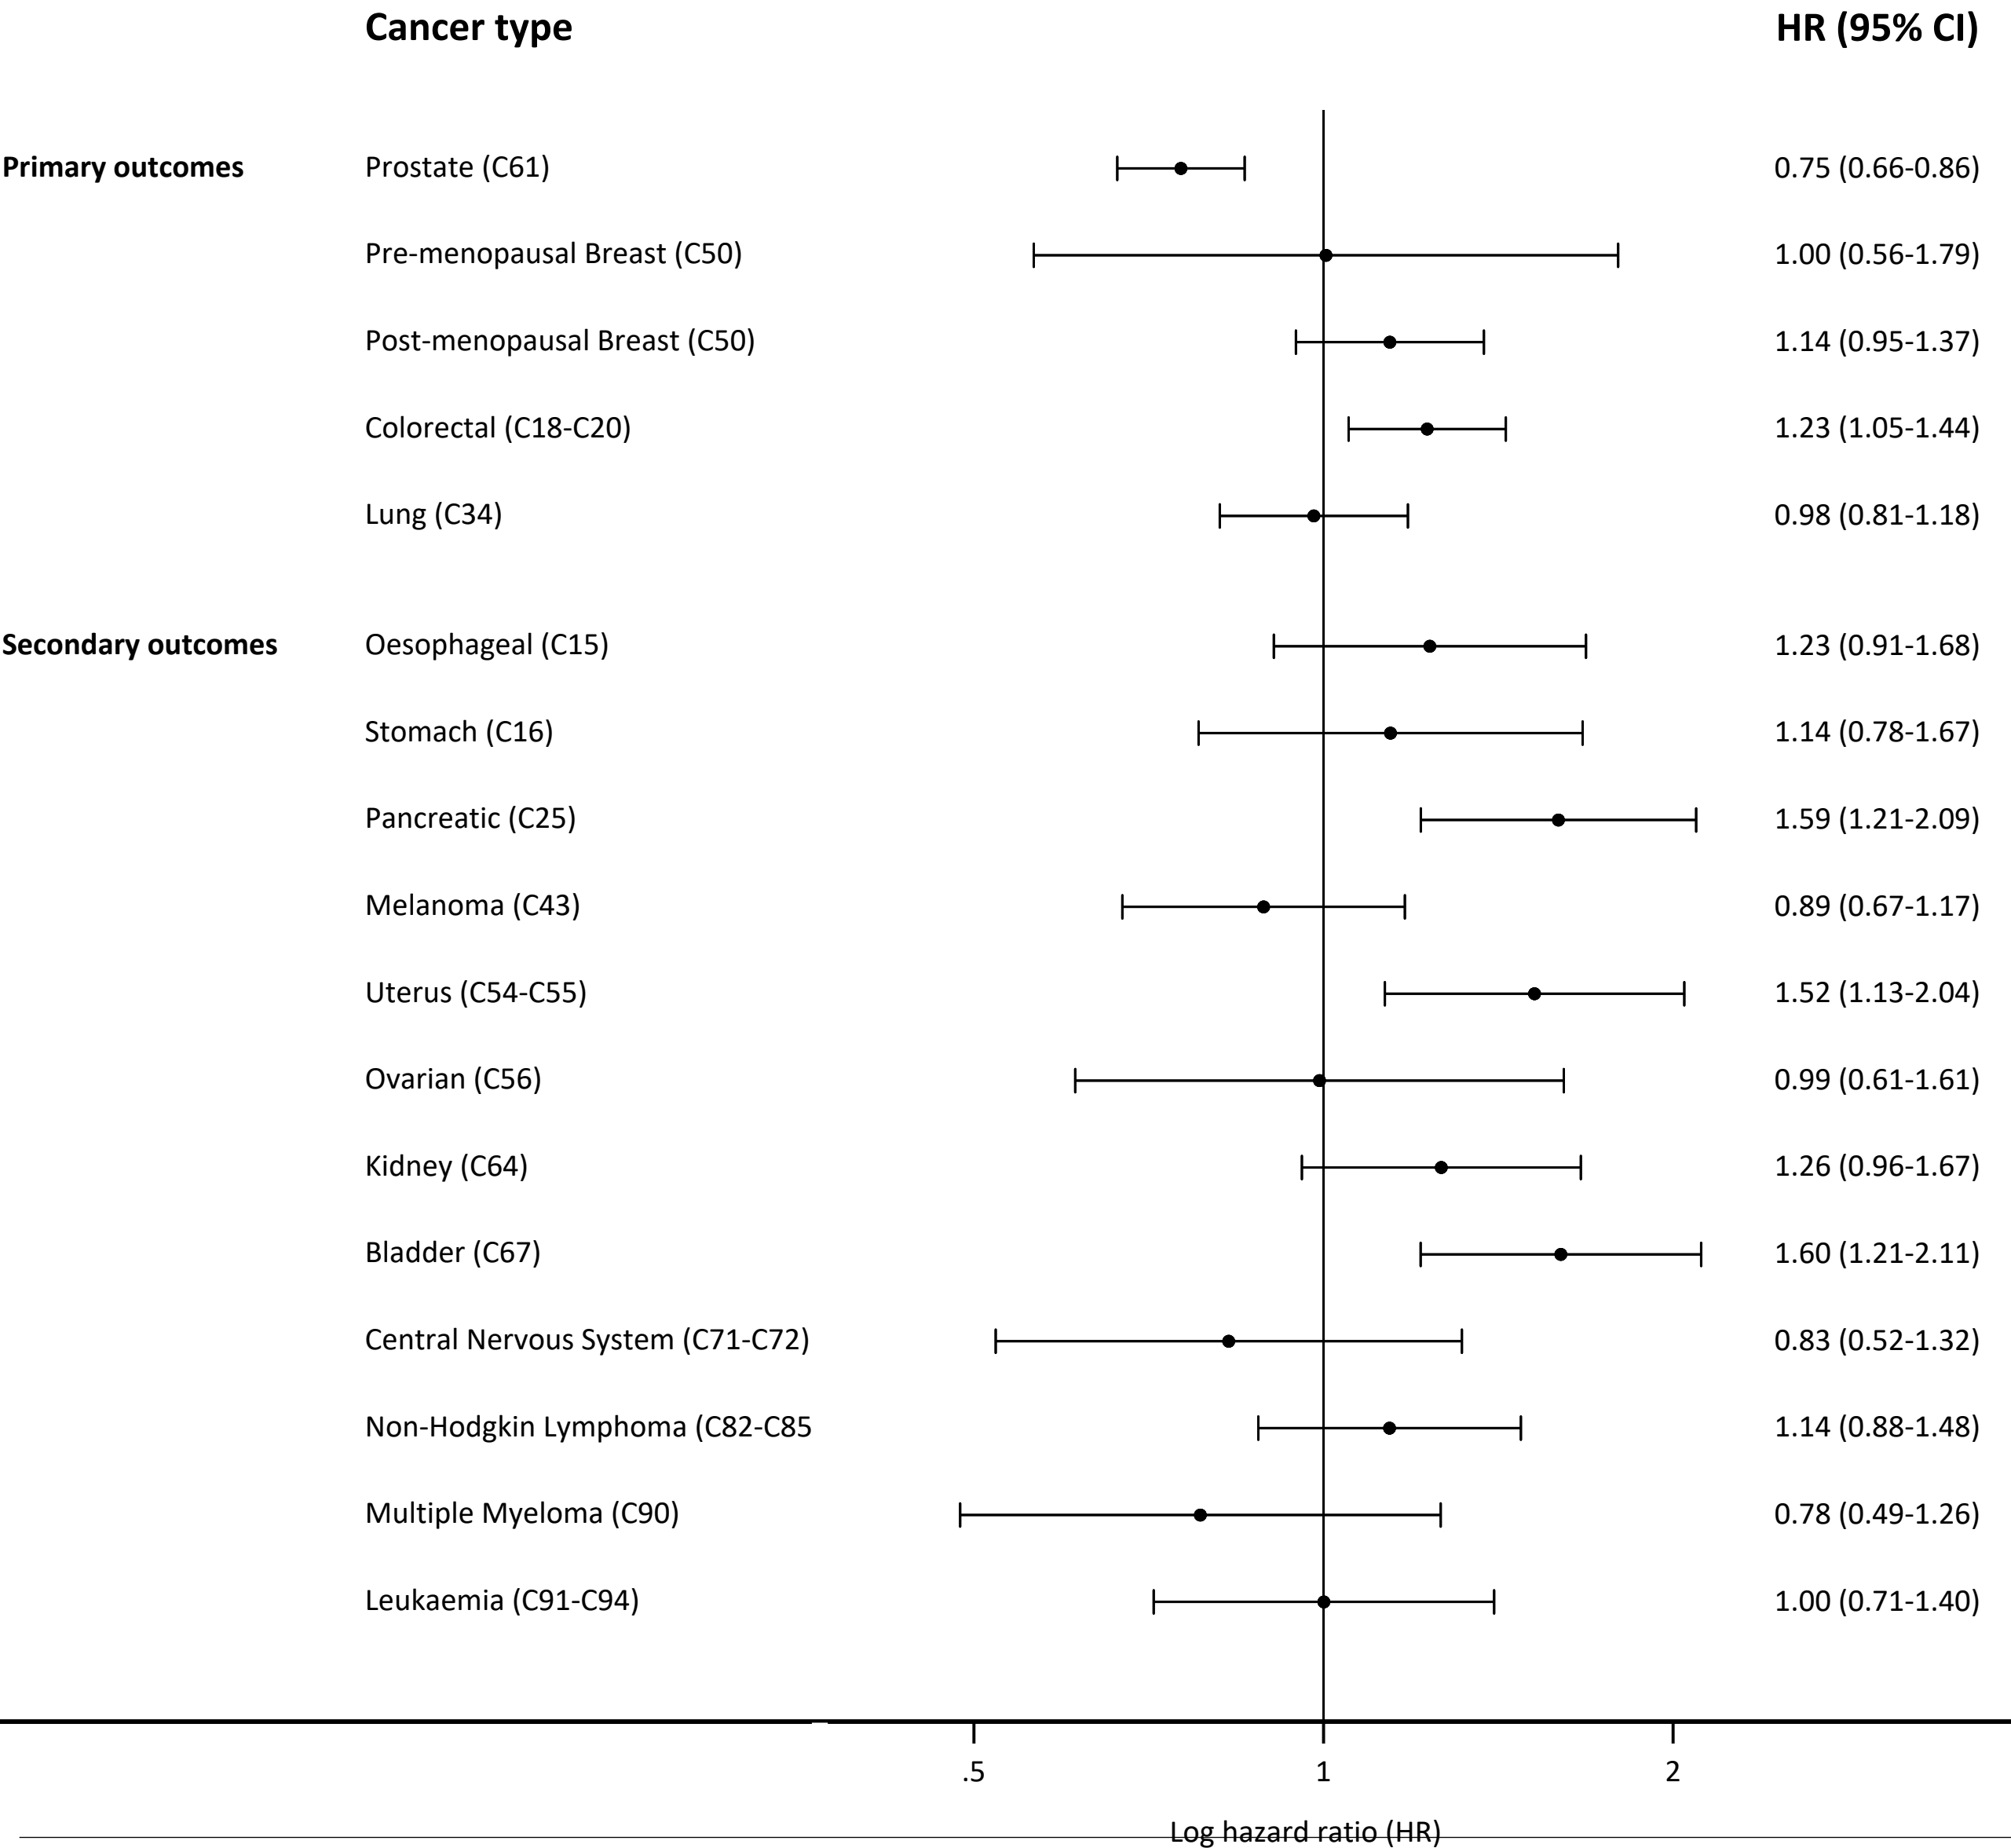

**Figure S12** *Post hoc* analysis adjusting associations between HbA1c and pre-menopausal cancer (C50) for maternal age at first live birth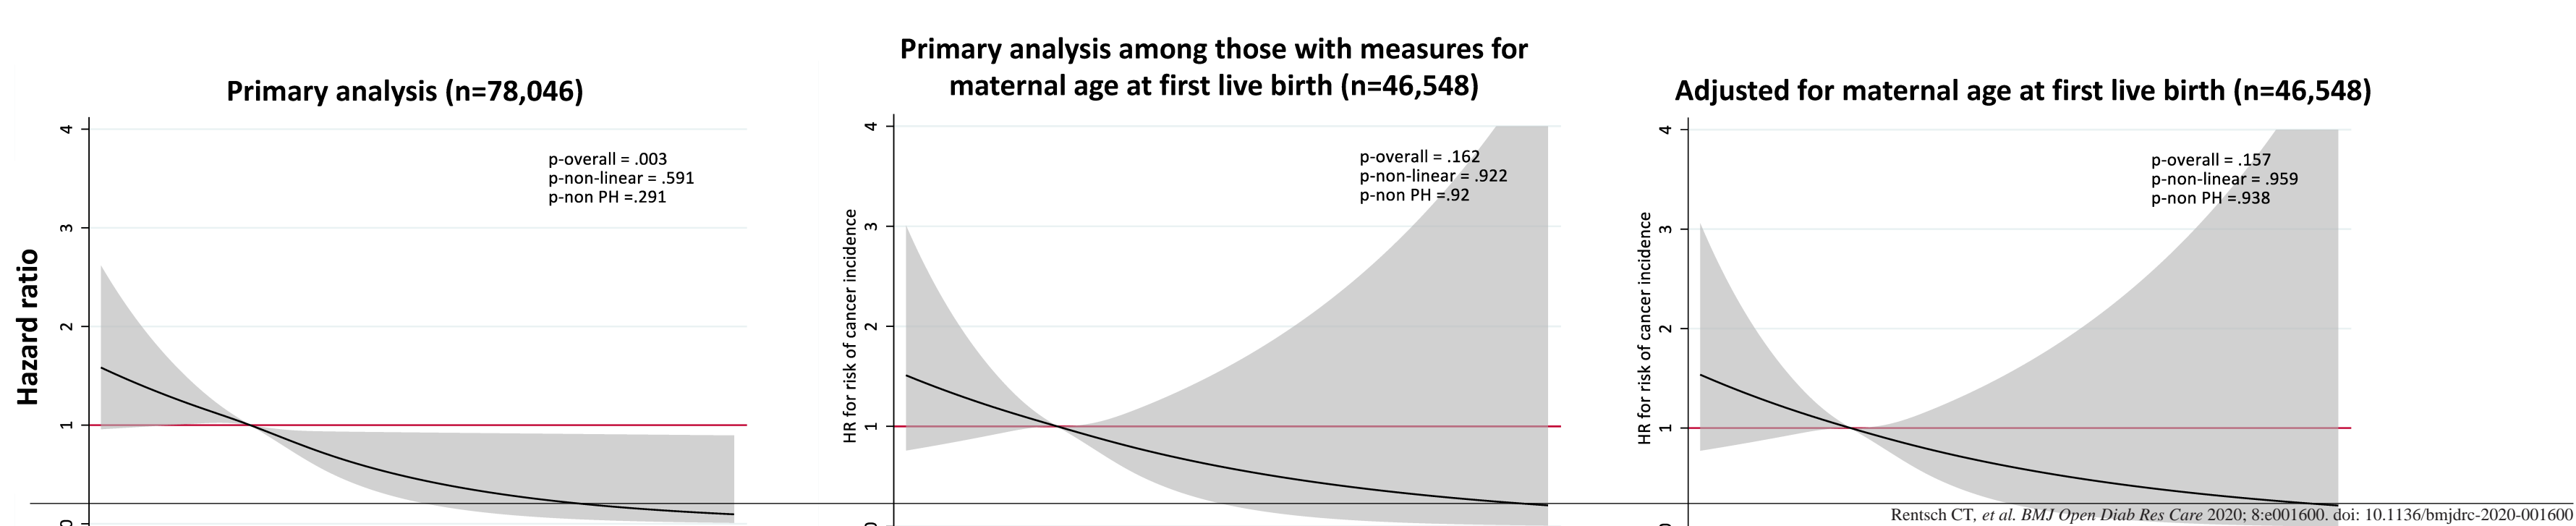

**figure S13** Associations between glycated haemoglobin (HbA1c) and incidence of common cancers in the UK Biobank, using age as time scale

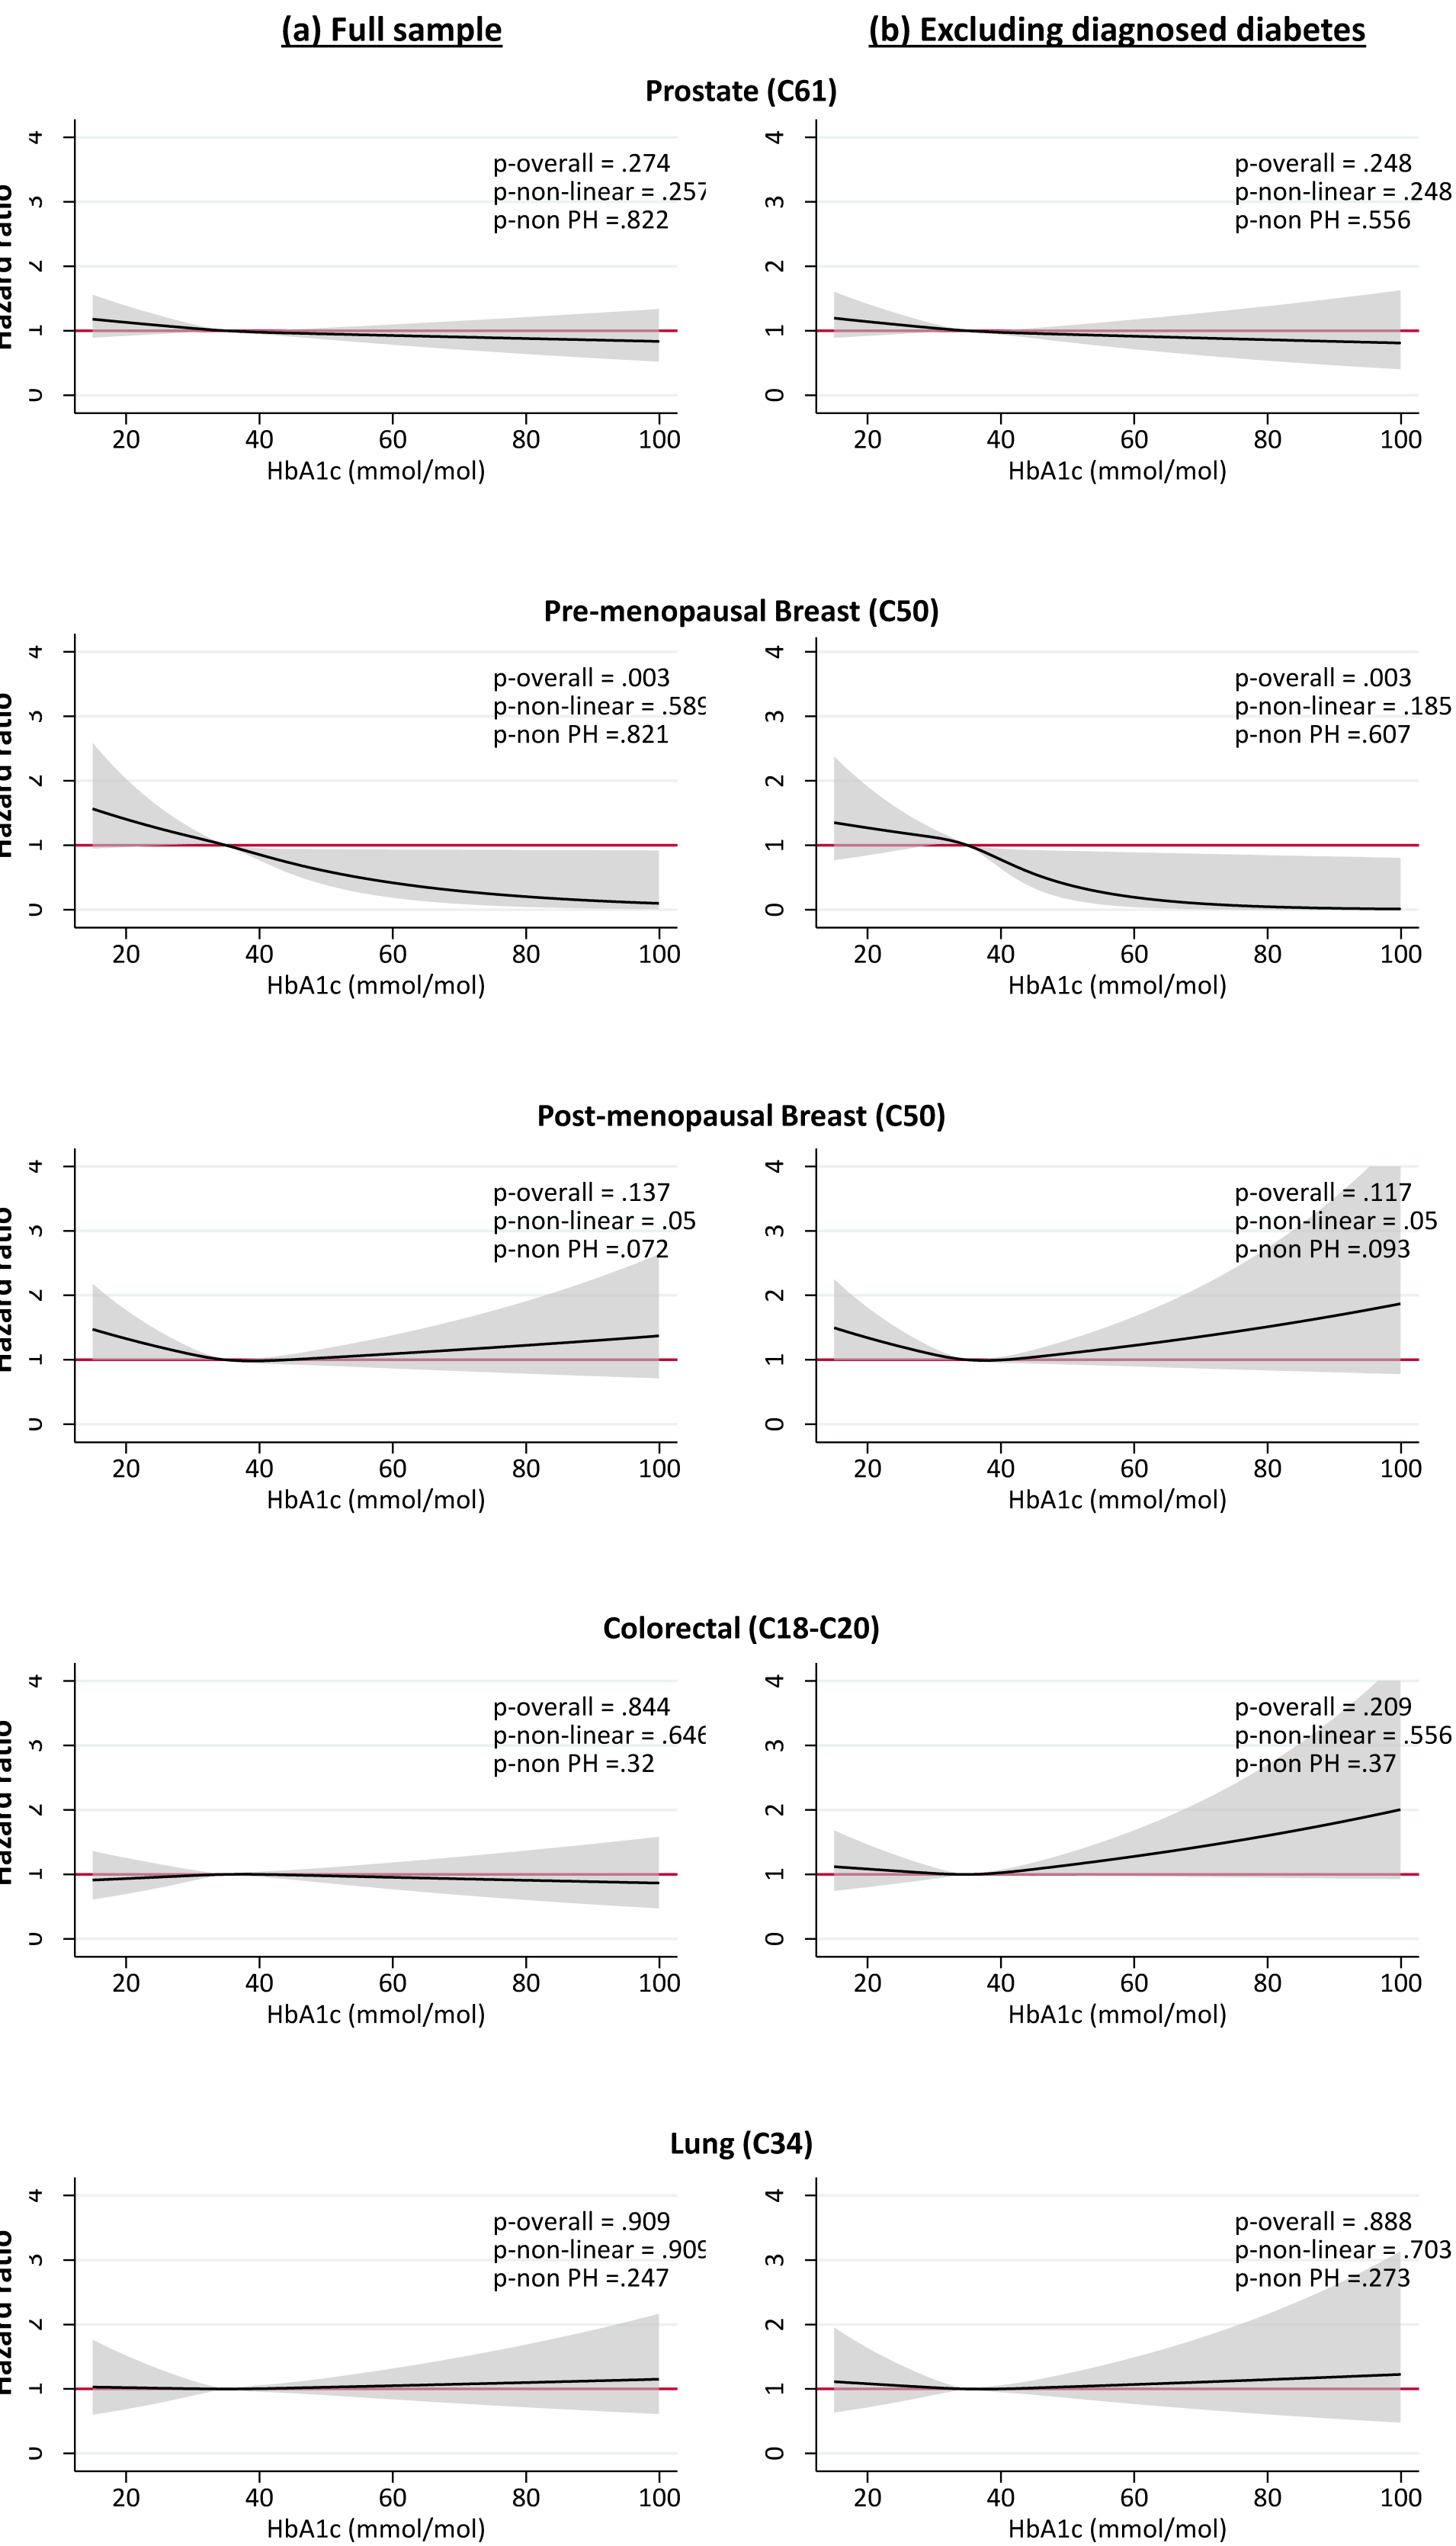

Supplement: inline-supplementary-material-2 [file inline-supplementary-material-2.pdf]
